# Supplementary material for: Exploring the dynamic behaviour and optical properties of indolocarbazole charge-transfer cocrystals
Source: Royal Society of Chemistry journal article supplement (doi:10.1039/d5ma00425j), 2025-01-01
Supplement: d5ma00425j1.pdf [file d5ma00425j1.pdf]

## *Supporting Information*

# *Exploring the Dynamic Behaviour and Optical Properties of Indolocarbazole Charge-Transfer Cocrystals*

Jade Cisneros<sup>a</sup>, Ernesto A. Hernández-Morales<sup>a</sup>, Armando Navarro-Huerta<sup>a</sup>, Jan Blahut<sup>b</sup>, Erika Bartůňková<sup>b</sup>, Simon J. Teat<sup>c</sup>, Rubén A. Toscano<sup>a</sup>, Martin Dračinský<sup>b\*</sup>, Braulio Rodríguez-Molina<sup>a\*</sup>

<sup>a</sup> *Instituto de Química, Universidad Nacional Autónoma de México, Circuito Exterior S/N, Ciudad Universitaria, Coyoacán 04510, Mexico City, Mexico.*

<sup>b</sup> *Institute of Organic Chemistry and Biochemistry, Czech Academy of Sciences, 160 00 Prague, Czech Republic.*

<sup>c</sup> *Advanced Light Source, Lawrence Berkeley National Laboratory, Berkeley, California 94720-8229, United States*

[\\*martin.dracinsky@uochb.cas.cz](mailto:martin.dracinsky@uochb.cas.cz)

[\\*brodriguez@iquimica.unam.mx](mailto:brodriguez@iquimica.unam.mx)

# Contents

|                                                        |     |
|--------------------------------------------------------|-----|
| Contents .....                                         | S2  |
| Materials and methods .....                            | S3  |
| Synthesis of compounds .....                           | S4  |
| 9-(2-nitrophenyl)-9H-carbazole (1).....                | S4  |
| 2-(9H-carbazole-9-yl)aniline (2) .....                 | S5  |
| Indolo[3,2,1- <i>jk</i> ]carbazole ( <b>ICZ</b> )..... | S5  |
| Preparation of cocrystals.....                         | S6  |
| Cocrystal <b>ICZ-TCNQ</b> .....                        | S6  |
| Cocrystal <b>ICZ-TFBQ</b> .....                        | S6  |
| Degree of Charge Transfer .....                        | S10 |
| Photothermal conversion measurements .....             | S15 |
| References.....                                        | S27 |

## Materials and methods

Reagents and solvents were purchased from Sigma-Aldrich and were used without further purification. The 7,7,8,8-tetracyanoquinodimethane was recrystallized with acetone. In all synthesis procedures, column chromatography was used as a purification method, using silica gel (mesh size 230 – 400, average pore size of 60 Å) as the stationary phase and mixtures of hexane/dichloromethane as the mobile phase. Reactions were monitored through TLC using silica gel plates 60 GF<sub>254</sub> purchased from Merck and spots were detected by UV-light absorption. Solution <sup>1</sup>H and <sup>13</sup>C experiments were recorded at room temperature using Bruker Avance III 400. The spectroscopic data is referenced to CDCl<sub>3</sub>. High-Resolution Mass Spectrometry was obtained in a Jeol JMS-AccuTOF JMS-T100LC spectrometer, ionization mode: Direct Analysis in Real Time (DART). FTIR spectra experiments were recorded with Bruker Tensor-27 ATR equipped with a diamond tip in the spectral window from 4000 to 400 cm<sup>-1</sup>. Melting points were determined in a Fisher-Jones melting point apparatus. Powder X-ray diffraction analyses were carried out using a Bruker D8 Advance diffractometer with CuKα radiation at 1.5418 Å and a LinxEye detector. Operating at 30 kV and 25 mA, the 2θ scanning range was from 5 to 50° with a step size of 0.03° and a time per step of 0.3 s. The DSC/TGA were recorded in a Netzsch model STA 449 F3 Jupiter, under a nitrogen atmosphere and heating rate of 10 °C/min from 25 °C to 400 °C. The UV-Vis absorption analyses were obtained using a Perkin-Elmer spectrometer Lambda 900 with the diffuse reflectance technique. Single crystal X-ray diffraction analyses were obtained using a Bruker APEX-II or D8Venture CCD diffractometer with CuKα or MoKα radiation. The data was refined using SHEXL-2019/3 software. The B-level alerts found in the checkCIF report for ICZ structure are due to the poor diffraction quality of the crystal, mainly caused by its size and morphology. Solid-state NMR experiments were performed on a JEOL 600 MHz spectrometer at a 14.1 T field corresponding to a 600 MHz <sup>1</sup>H Larmor frequency, equipped with a 3.2 mm HX probe. The sample was packed in a 3.2 mm zirconia rotor. The <sup>13</sup>C{<sup>1</sup>H} spectra were acquired using cross-polarization experiment with 5 ms mixing time and pre-acquisition delay set to 1.5×*T<sub>1</sub>* (<sup>1</sup>H) (as <sup>1</sup>H obtained from saturation recovery experiment). The *T<sub>1</sub>* (<sup>19</sup>F) was determined under static conditions using saturation recovery experiment with spin-echo detection. At high temperature *T<sub>set</sub>* ≥ 25 °C the signal of **TFBQ** was resolved from signal of probe background, and saturation-recovery data were therefore fitted using three-parameter exponential function. At lower temperature the signal of **TFBQ** overlaps with the background and, therefore, the data were fitted using double-exponential function with one of the relaxation times fixed on 2.2 s i.e. *T<sub>1</sub>* (<sup>19</sup>F) of probe background determined separately. Real sample temperature were determined using chemical shift of <sup>207</sup>Pb (at 18 kHz MAS and 1 kHz for static case).<sup>S1</sup> All raw data are available in Zenodo archive. [<https://doi.org/10.5281/zenodo.15017371>]. The periodic DFT geometry optimizations were performed using the CASTEP program,<sup>S2</sup> version 22.11, which uses pseudopotentials to model the effects of core electrons and plane waves to describe valence electrons. The unit-cell parameters were fixed, the electronic potential energy surface was modeled using the functional PBE.<sup>S3</sup> The optimizations were performed utilizing the plane-wave basis-set energy cutoff of 600 eV, default ultrasoft<sup>S4</sup> “on-the-fly” generation of

pseudopotentials, a minimum  $k$ -point spacing of  $0.1 \text{ \AA}^{-1}$  over the Brillouin zone via a Monkhorst–Pack grid,<sup>S5</sup> and empirical dispersion corrections using the TS correction scheme.<sup>S6</sup> Molecular clusters were extracted from the optimized crystal structures. The clusters consisted of the central **TFBQ** molecule and all surrounding molecules with contacts shorter than the sum of vdW radii. Rotamers of the cocrystals with the central molecule rotated by  $+60$  and  $-60^\circ$  were created and the geometries of the central molecule in these clusters were optimized at the DFT level using Gaussian16 software,<sup>S7</sup> the B3LYP functional<sup>S8,S9</sup> and 3-21g basis set. The positions of all atoms in the cluster except the central **TFBQ** molecule were fixed. The transition-state structures were searched using the QST3 method.

## Synthesis of compounds

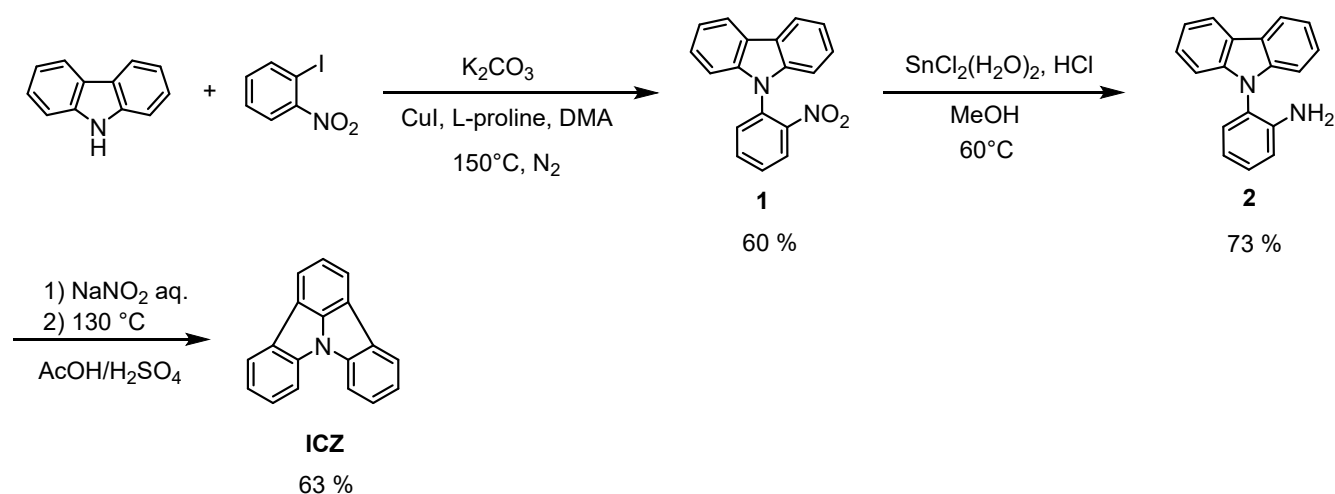

**Scheme S1.** General procedure of the synthesis of **ICZ**.

### 9-(2-nitrophenyl)-9H-carbazole (**1**)

In a two-neck round-bottom flask with magnetic stirrer 9H-carbazole (300 mg, 1.79 mmol, 1 eq), 1-iodo-2-nitrobenzene (670 mg, 2.69 mmol, 1.5 eq), potassium carbonate (1.12 g, 8.07 mmol, 4.5 eq), copper(I) iodide (25.6 mg, 0.13 mmol, 5% mol), L-proline (5.2 mg, 0.04 mmol, 1.7% mol) were added in dry *N,N*-dimethylacetamide (10 mL) and degassed with  $N_2$ . The mixture was heated at  $150^\circ\text{C}$  for 40 hours. After cooling down to room temperature, the mixture was diluted with ethyl acetate and washed with water (3x10 mL). The solvent was removed by rotatory evaporation and the compound **1** was purified by silica gel column chromatography with 3 mL of triethylamine, followed by a mixture of hexane/dichloromethane (95:5). The product was recovered as a yellow solid. (0.307 g, **yield 60%**, **m.p.**  $150\text{--}155^\circ\text{C}$ ).  $^1\text{H NMR}$  (500 MHz,  $\text{CDCl}_3$ )  $\delta$ : 8.17 (dd,  $J = 8.5, 1.5 \text{ Hz}$ , 1H), 8.13 (dt,  $J = 7.8, 0.9 \text{ Hz}$ , 2H), 7.84 (td,  $J = 7.8, 1.5 \text{ Hz}$ , 1H), 7.68 (ddd,  $J = 8.2, 6.5, 1.5 \text{ Hz}$ , 2H), 7.39 (ddd,

$J = 8.3, 7.1, 1.3$  Hz, 2H), 7.30 (td,  $J = 7.5, 1.0$  Hz, 2H), 7.11 (dt,  $J = 8.2, 0.9$  Hz, 2H).  $^{13}\text{C}$  NMR (126 MHz,  $\text{CDCl}_3$ )  $\delta$ : 147.44, 140.79, 134.24, 131.44, 131.32, 129.15, 126.34, 125.97, 123.87, 120.69, 120.59, 109.07. FTIR (ATR,  $\text{cm}^{-1}$ )  $\nu_{\text{max}}$ : 3048, 1945, 1909, 1876, 1824, 1790, 1602, 1524, 1451, 1349, 1227, 848, 781, 749, 633, 433. HRMS (DART):  $m/z$   $[\text{C}_{18}\text{H}_{13}\text{N}_2\text{O}_2]^+$ , calculated 289.09770, found 289.09743,  $|\Delta (m/z)|$  (ppm): 0.96.

### *2-(9H-carbazole-9-yl)aniline (2)*

In a round-bottom flask 9-(2-nitrophenyl)-9H-carbazole (300 g, 1.04 mmol, 1 eq.) was dissolved in methanol (10 mL).  $\text{SnCl}_2 \cdot (\text{H}_2\text{O})_2$  (1.17 g, 5.20 mmol, 5 eq.) was used as reducing agent in 5 mL of concentrated 33% HCl. The mixture was heated at 70 °C for 5 hours. After cooling down to room temperature, the reaction mixture was extracted with ethyl acetate and the solution was left to crystallize at 0 °C. The compound **2** was filtered and washed with cold hexane. The product was recovered as a white solid. (0.196 g, **yield 73%**, **m.p.** 110-115 °C).  $^1\text{H}$  NMR (400 MHz,  $\text{CDCl}_3$ )  $\delta$ : 8.15 (dt,  $J = 7.7, 1.0$  Hz, 2H), 7.40 (ddd,  $J = 8.3, 7.1, 1.2$  Hz, 2H), 7.35 – 7.21 (m, 4H), 7.18 (dt,  $J = 8.2, 0.9$  Hz, 2H), 6.98 – 6.84 (m, 2H), 3.30 (s, 2H).  $^{13}\text{C}$  NMR (101 MHz,  $\text{CDCl}_3$ )  $\delta$ : 144.13, 140.75, 129.75, 129.72, 126.12, 123.46, 122.43, 120.44, 119.98, 118.99, 116.67, 110.25. FTIR (ATR,  $\text{cm}^{-1}$ )  $\nu_{\text{max}}$ : 3472, 3381, 3051, 1609, 1500, 1446, 1311, 1228, 1176, 745, 724, 626, 526, 423. HRMS (DART):  $m/z$   $[\text{C}_{18}\text{H}_{15}\text{N}_2]^+$ , calculated 259.12352, found 259.12413,  $|\Delta (m/z)|$  (ppm): 2.34.

### *Indolo[3,2,1-jk]carbazole (ICZ)*

To a solution of 2-(9H-carbazole-9-yl)-aniline (50 mg, 0.19 mmol, 1 eq.) in  $\text{AcOH}:\text{H}_2\text{SO}_4$  10:1 %v/v (1.5 mL) mixture was added dropwise an aqueous solution of sodium nitrite (20 mg, 0.29 mmol, 1.5 eq in 2.5 mL water) over a period of 20 min. The temperature of the mixture was maintained below 10 °C while addition. The mixture was stirred at 10 °C for 15 min and then stirred at 130 °C for 24 h. The reaction mixture was cooled to room temperature and was diluted with ethyl acetate and washed with water (3x10 mL). The solvent was removed by rotatory evaporation and the compound **ICZ** was purified by silica gel column chromatography eluted with hexane. The product was recovered as a white solid. (0.027 g, **yield 63%**, **m.p.** 136-140 °C)  $^1\text{H}$  NMR (500 MHz,  $\text{CDCl}_3$ )  $\delta$ : 8.15 (dt,  $J = 7.8, 1.0$  Hz, 2H), 8.05 (d,  $J = 7.4$  Hz, 2H), 7.92 (dt,  $J = 8.1, 0.9$  Hz, 2H), 7.62 – 7.52 (m, 3H), 7.36 (td,  $J = 7.6, 1.0$  Hz, 2H).  $^{13}\text{C}$  NMR (126 MHz,  $\text{CDCl}_3$ )  $\delta$ : 143.80, 138.76, 130.08, 126.74, 123.19, 122.86, 121.72, 119.43, 118.50, 112.19. FTIR (ATR,  $\text{cm}^{-1}$ )  $\nu_{\text{max}}$ : 3045, 2922, 2852, 1922, 1893, 1840, 1775, 1601, 1431, 1339, 1121, 793, 748, 683, 422. HRMS (DART):  $m/z$   $[\text{C}_{18}\text{H}_{12}\text{N}]^+$ , calculated 242.09697, found 242.09697,  $|\Delta (m/z)|$  (ppm): 0.00.

## Preparation of cocrystals

### Cocrystal ICZ-TCNQ

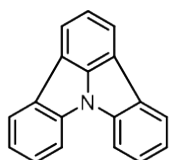

In a 4 mL vial 5 mg of ICZ (20.72  $\mu\text{mol}$ , 1 eq), 4.23 mg of TCNQ (20.72  $\mu\text{mol}$ , 1 eq) were added, then heated up to 90  $^{\circ}\text{C}$  until dissolved in acetone, then stop the heating and left cool to room temperature, after 3-5 days acicular black crystals were obtained.

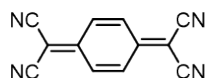

### Cocrystal ICZ-TFBQ

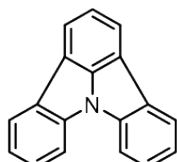

In a 4 mL vial 5 mg of ICZ (20.72  $\mu\text{mol}$ , 1 eq), 3.73 mg of TFBQ (20.72  $\mu\text{mol}$ , 1 eq) were added, then heated up to 90  $^{\circ}\text{C}$  until dissolved in acetone, then stop the heating and left cool to room temperature, after 3-5 days prismatic black crystals were obtained.

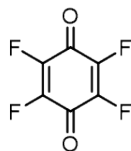

**Table S1.** Crystal structure parameters for **ICZ** at 300 K.

|                                             |                                      |                       |
|---------------------------------------------|--------------------------------------|-----------------------|
| Identification code                         | <b>ICZ</b>                           |                       |
| Empirical formula                           | $\text{C}_{18}\text{H}_{11}\text{N}$ |                       |
| Formula weight                              | 241.28                               |                       |
| Temperature (K)                             | 298(2)                               |                       |
| Wavelength ( $\text{\AA}$ )                 | 1.54178                              |                       |
| Crystal system                              | Orthorhombic                         |                       |
| Space group                                 | $Pca2_1$                             |                       |
| Unit cell dimensions                        | $a = 26.734(2) \text{ \AA}$          | $\alpha = 90^{\circ}$ |
|                                             | $b = 5.1426(4) \text{ \AA}$          | $\beta = 90^{\circ}$  |
|                                             | $c = 35.293(3) \text{ \AA}$          | $\gamma = 90^{\circ}$ |
| Volume ( $\text{\AA}^3$ )                   | 4852.1(6)                            |                       |
| Z                                           | 16                                   |                       |
| Density ( $\text{mg m}^{-3}$ )              | 1.321                                |                       |
| Absorption coefficient ( $\text{mm}^{-1}$ ) | 0.593                                |                       |
| F(000)                                      | 2016                                 |                       |
| Crystal size ( $\text{mm}^3$ )              | 0.417 x 0.064 x 0.046                |                       |
| Theta range for data collection             | 2.504 to $70.048^{\circ}$            |                       |
| Index ranges                                | $-22 \leq h \leq 32$                 |                       |
|                                             | $-6 \leq k \leq 6$                   |                       |

|                                                  |                                             |
|--------------------------------------------------|---------------------------------------------|
|                                                  | -30 ≤ l ≤ 42                                |
| Reflections collected                            | 36911                                       |
| Independent reflections                          | 7184 [R(int) = 0.0847]                      |
| Completeness to theta = 25.242°                  | 99.6 %                                      |
| Absorption correction                            | Semi-empirical from equivalents             |
| Max. and min. transmission                       | 0.7535 and 0.6176                           |
| Refinement method                                | Full-matrix least-squares on F <sup>2</sup> |
| Data / restraints / parameters                   | 7184 / 1 / 685                              |
| Goodness-of-fit on F <sup>2</sup>                | 1.276                                       |
| Final R indices [I > 2sigma(I)]                  | R1 = 0.1539<br>wR2 = 0.3345                 |
| R indices (all data)                             | R1 = 0.1985<br>wR2 = 0.3855                 |
| Absolute structure parameter                     | 1.6(10)                                     |
| Extinction coefficient                           | n/a                                         |
| Largest diff. peak and hole (e.Å <sup>-3</sup> ) | 0.990 and -0.485                            |

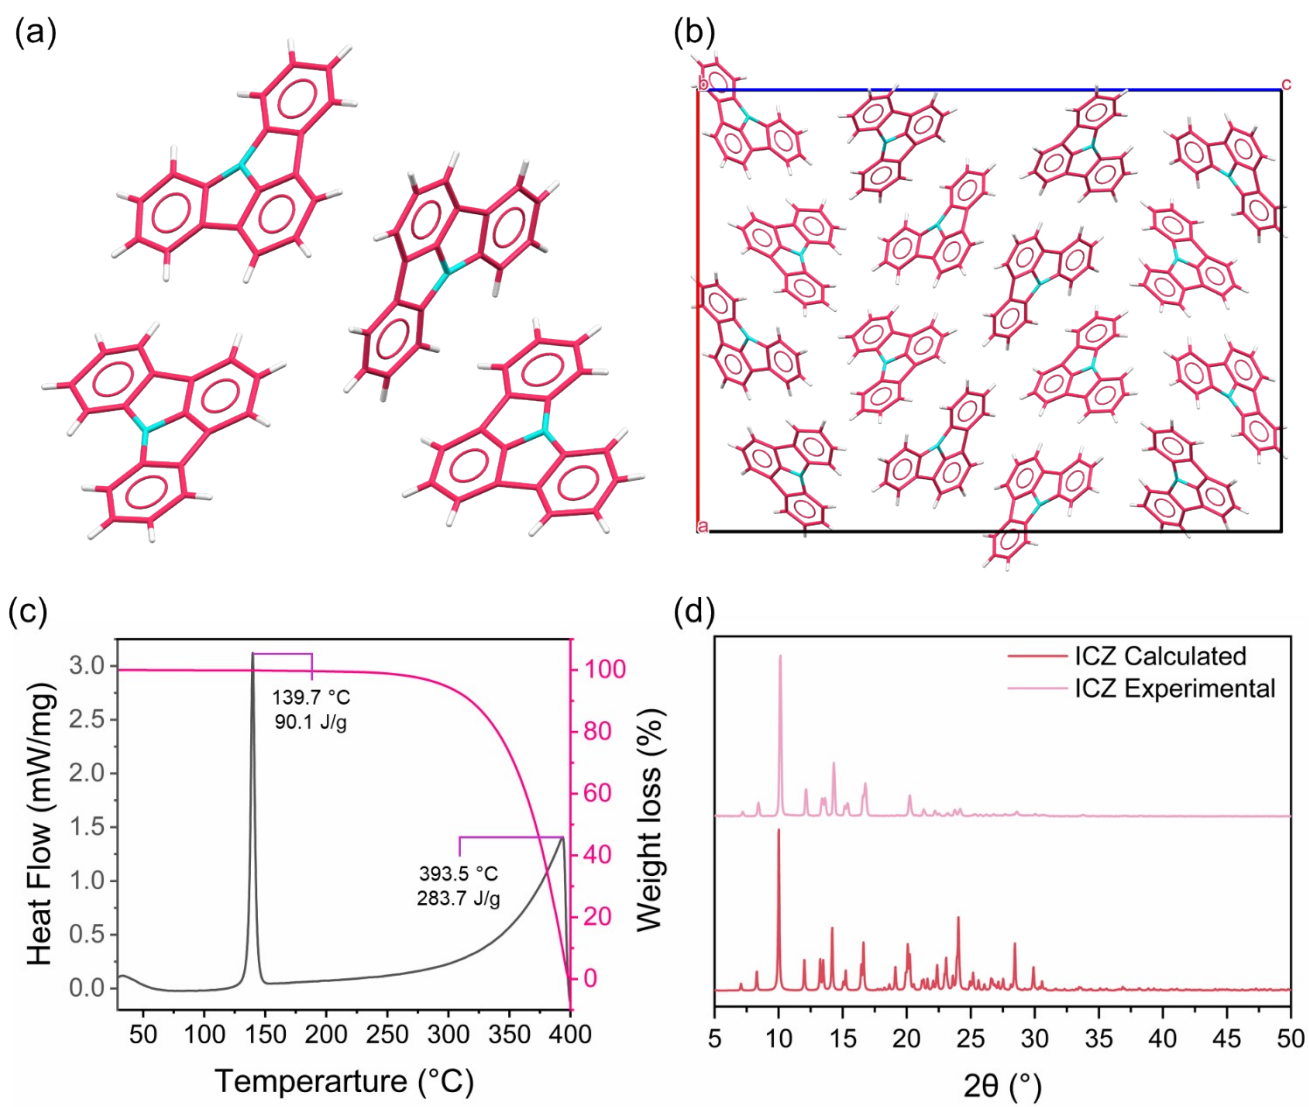

**Figure S1.** (a) Single-crystal structure of **ICZ**. (b) Unit cell of **ICZ** along *b*-axis. (c) Coupled DSC and TGA of **ICZ** powder. (d) PXRD diffractogram of **ICZ** calculated and experimental.



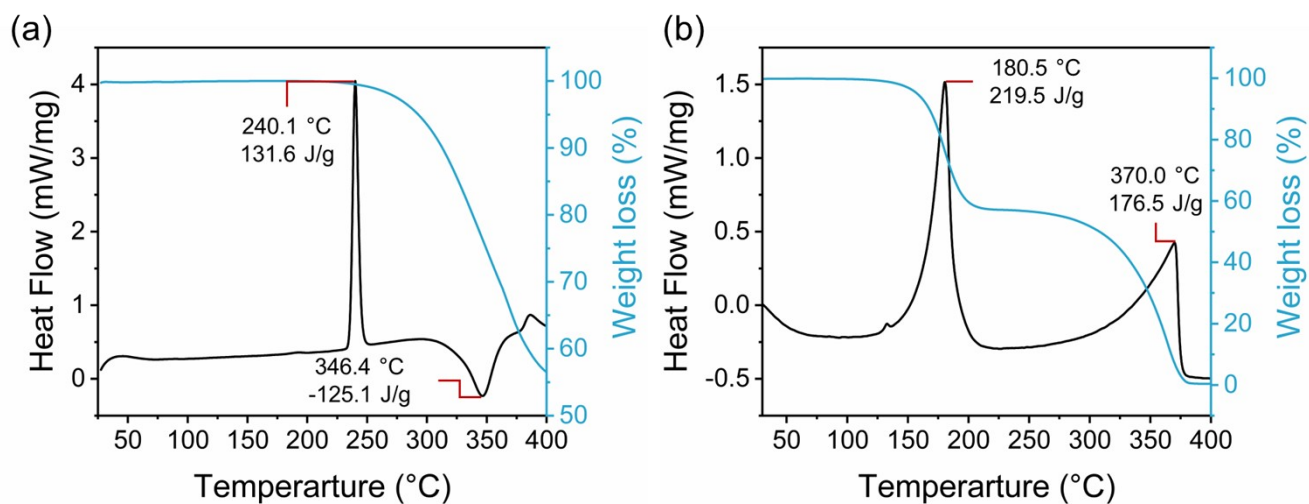

**Figure S2.** Coupled DSC and TGA analysis of each cocrystal: (a) **ICZ-TCNQ** and (b) **ICZ-TFBQ**.

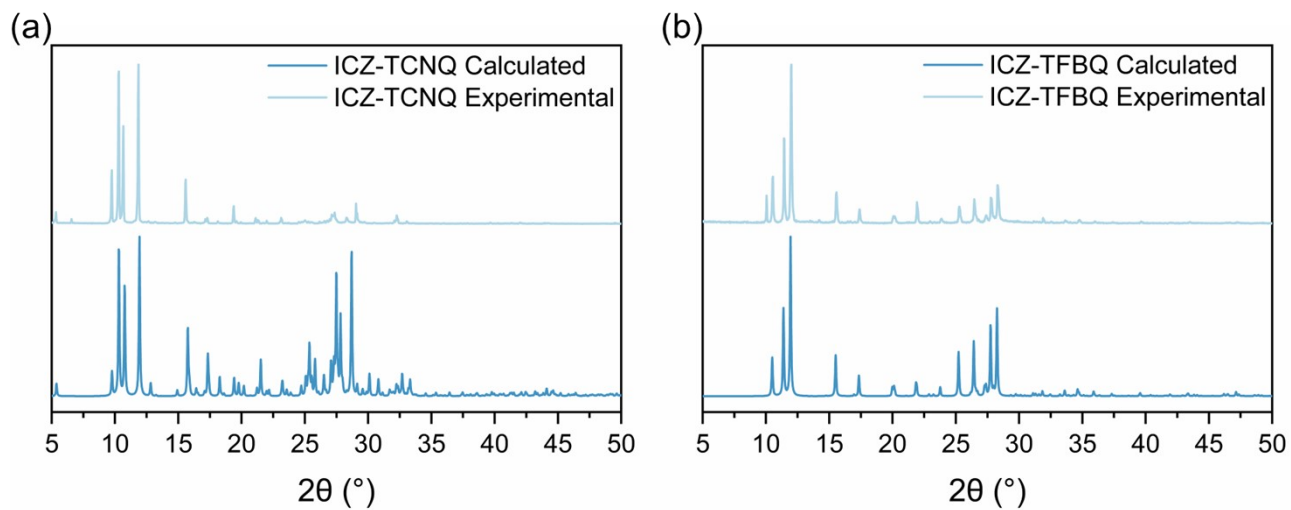

**Figure S3.** PXRD patterns of each cocrystal calculated and experimental for (a) **ICZ-TCNQ** and (b) **ICZ-TFBQ** cocrystal.

## Degree of Charge Transfer

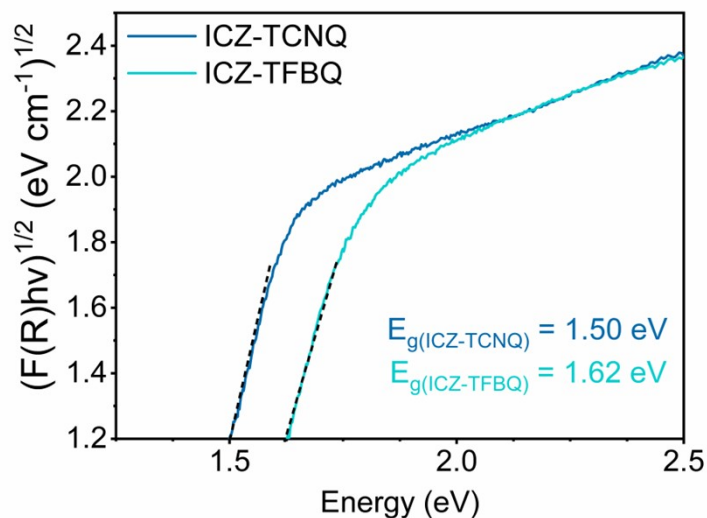

**Figure S4.** Modified Tauc plot obtained from diffuse reflectance UV-vis spectroscopy.

The calculations of the degree of charge transfer (DCT) were carried out using equation 1. This model assumes that, in an ideal charge transfer process, a 100 % electron transfer from the donor to the acceptor would be achieved. However, this depends on the ionization energy of the donor and the electron affinity of the acceptor. Therefore, the vibrational modes of the acceptor radical anion, which represents an ideal CT process and the vibrational modes of the neutral acceptor, which indicates no CT process are considered. The vibrational frequencies of the CT complex are analyzed, where the DCT for the CT complex must exceed a value of 0.03.<sup>S10</sup>

DCT values for each cocrystal were calculated from Equation 1:

$$DCT = \frac{2 \Delta v}{v_0} \left( 1 - (v_1^2/v_0^2) \right)^{-1} \quad (1)$$

where  $\Delta v = v_0 - v_{CT}$  with  $v_0$ ,  $v_{CT}$  and  $v_1$  representing the stretching frequencies of the neutral acceptor, the CT complex and the acceptor's anion, respectively.

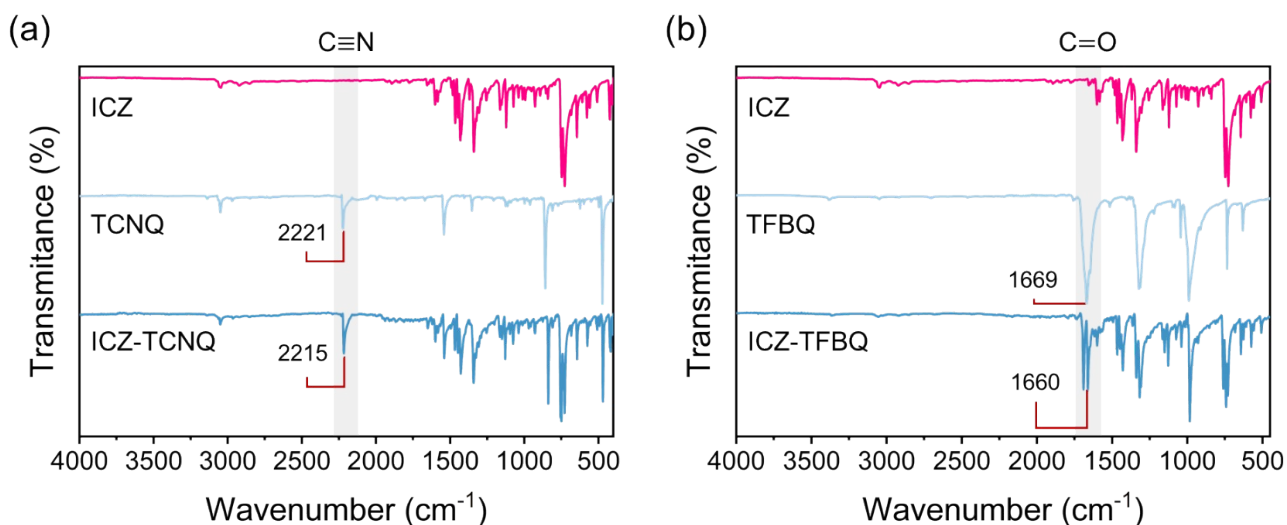

**Figure S5.** (a) FTIR spectra of **ICZ**, **TCNQ** and **ICZ-TCNQ**. (b) FTIR spectra of **ICZ**, **TFBQ** and **ICZ-TFBQ**. It focuses on the vibrational mode of the cyano or carbonyl group in the coformer and the cocrystal, respectively.

**Table S2.** Stretching mode values used in the DCT calculation for each cocrystal.

| Cocrystal       |                            | $\nu_0$ ( $\text{cm}^{-1}$ ) | $\nu_{CT}$ ( $\text{cm}^{-1}$ ) | $\nu_1$ ( $\text{cm}^{-1}$ ) | DCT  |
|-----------------|----------------------------|------------------------------|---------------------------------|------------------------------|------|
| <b>ICZ-TCNQ</b> | $\text{C} \equiv \text{N}$ | 2221                         | 2215                            | 2199 <sup>S11</sup>          | 0.27 |
| <b>ICZ-TFBQ</b> | $\text{C} = \text{O}$      | 1669                         | 1660                            | 1520 <sup>S12</sup>          | 0.06 |

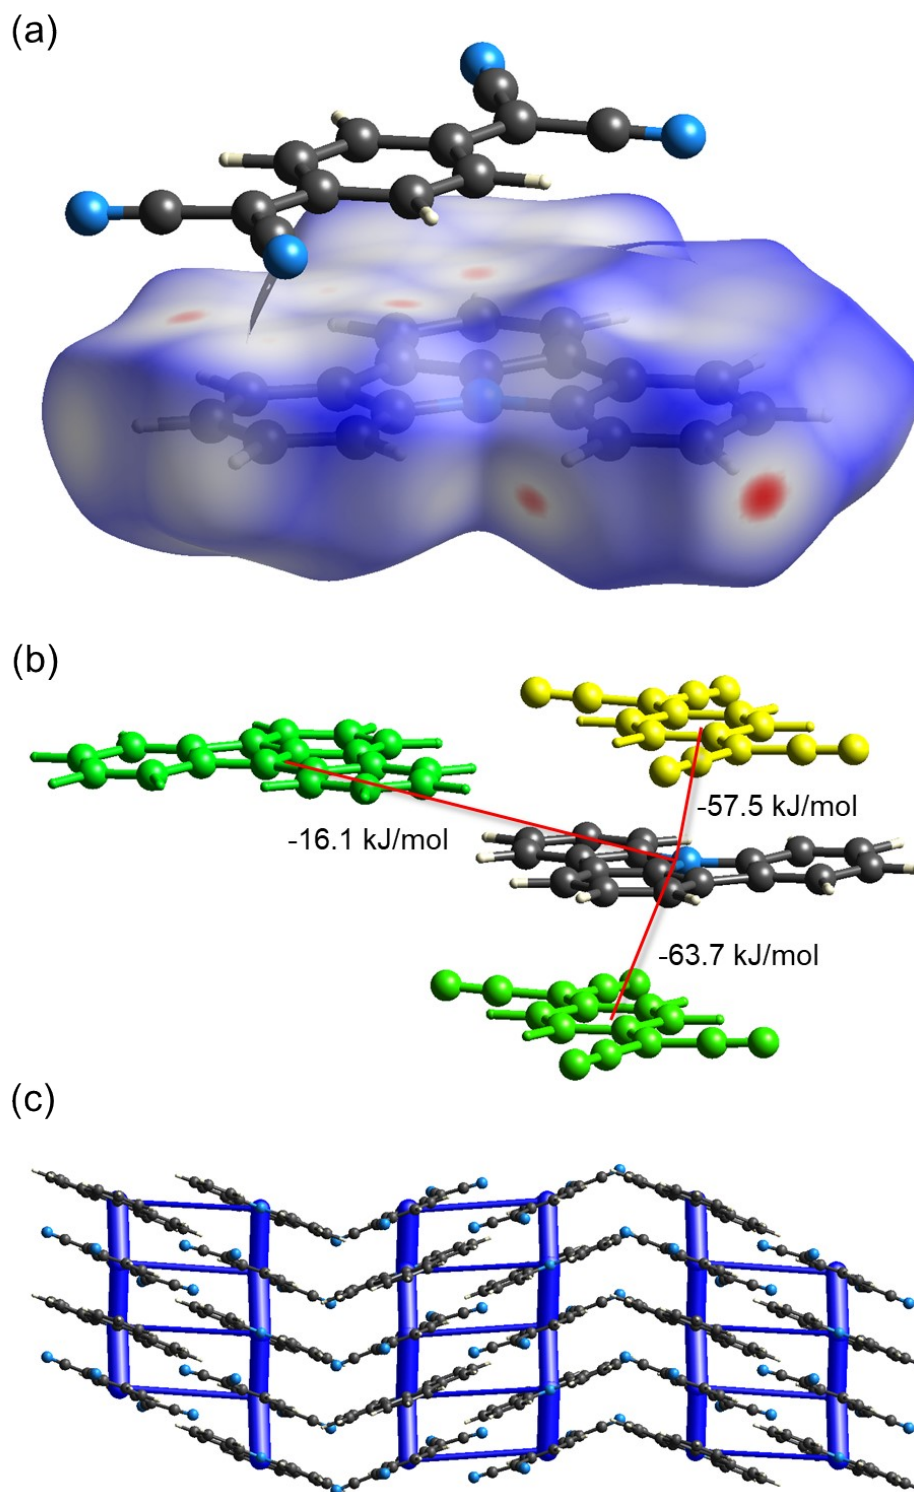

**Figure S6.** (a) Hirshfeld surface of ICZ plotted with  $d_{norm}$ . (b) Calculated total interaction energies between one ICZ molecule and its surrounding acceptor molecules. (c) Energy frameworks all over ICZ-TCNQ packing.

(a)

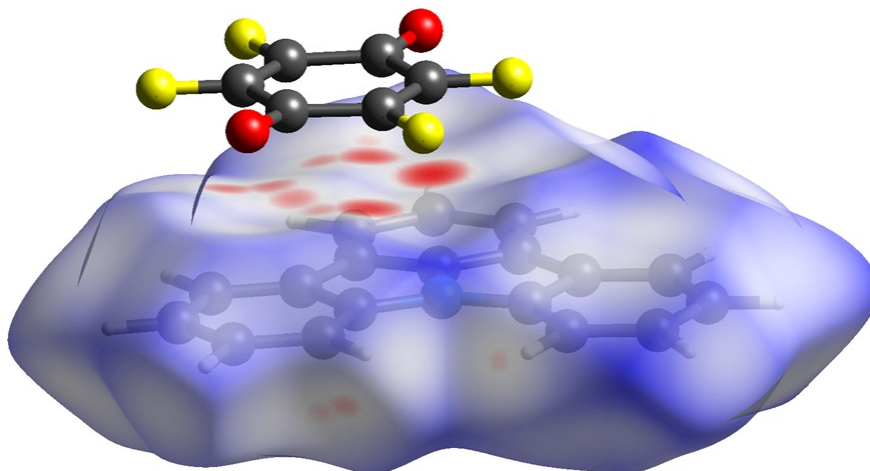

(b)

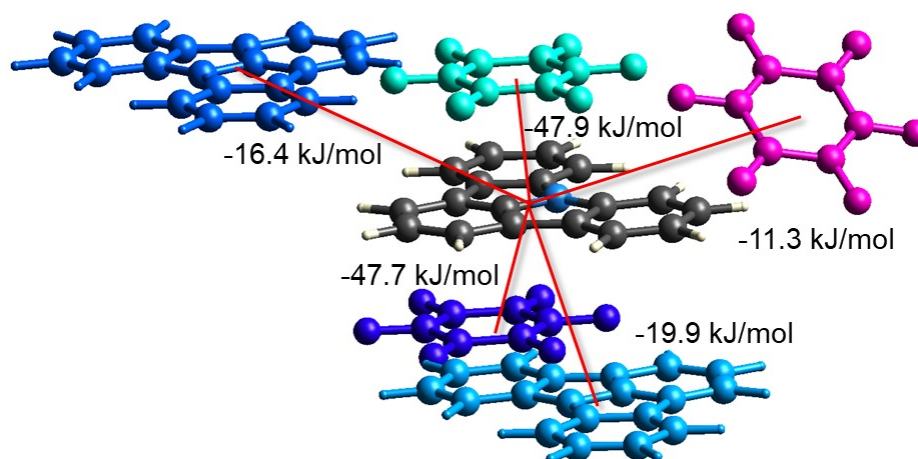

(c)

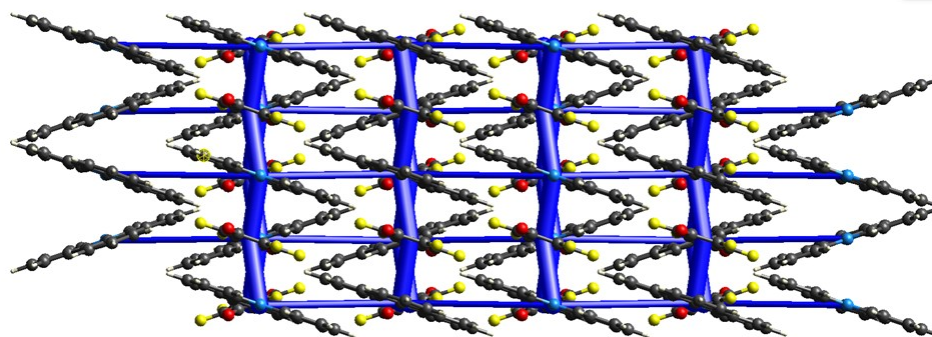

**Figure S7.** a) Hirshfeld surface of ICZ plotted with  $d_{norm}$ . (b) Calculated total interaction energies between one ICZ molecule and its surrounding acceptor molecules. (c) Energy frameworks all over ICZ-TFBQ packing.

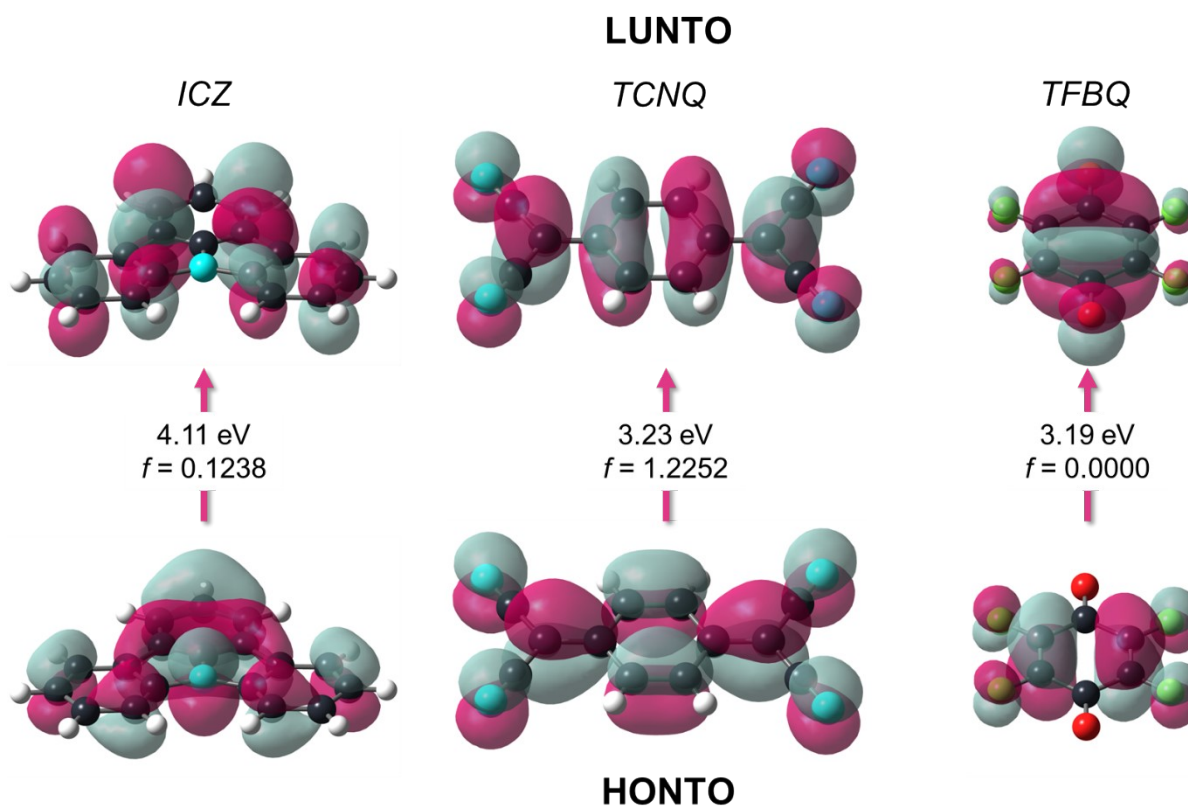

**Figure S8.** Natural transition orbitals (NTOs) of starting materials **ICZ**, **TCNQ** and **TFBQ** using TDDFT with CAM-B3LYP functional at the 6-311+G(d,p) level of theory. The associated energies (in eV) and oscillator strengths ( $f$ ) are included.



## Photothermal conversion measurements

Photothermal conversion measurements and calculations were conducted following the methodology described by Navarro-Huerta and others.<sup>S13</sup> For each cocrystal, a polycrystalline powdered sample was placed in a quartz sheet (25.4 mg of **ICZ-TCNQ** and 67.6 mg of **ICZ-TFBQ**). The samples were irradiated with an 808 nm red dot laser equipped with a focusing lens (Class IIIb). Temperature measurements were recorded at 1-second intervals using a Flir One GEN3 thermal imaging camera connected to a Samsung C-port. The specific heat capacity (Cp) of each cocrystal was determined using a TA Instruments Thermogravimetric Analyzer employing the Sapphire method. Based on **Figure S10**, the mean Cp value was calculated for each cocrystal before any phase transition. Therefore, the Cp values for the different cocrystals and the quartz sheets are 1.45 J g<sup>-1</sup> °C<sup>-1</sup> for **ICZ-TCNQ** and 1.02 J g<sup>-1</sup> °C<sup>-1</sup> for **ICZ-TFBQ**. Photothermal conversion efficiency (PTCE) can be calculated as equation 2:

$$\eta = \frac{hS\Delta T_{max}}{I(1 - 10^{-A_{\lambda}})} \quad (2)$$

**Table S3.** Summary of the values for Photothermal Conversion experiments for each cocrystal.

| ICZ-TCNQ (Power density $I = 0.5 \text{ W/cm}^2$ ) |                |                       |        |
|----------------------------------------------------|----------------|-----------------------|--------|
| Cycle                                              | $\tau_s$ (s)   | $\Delta T_{max}$ (°C) | $\eta$ |
| 1                                                  | 66.70          | 16.8                  | 11.5   |
| 2                                                  | 62.32          | 16.7                  | 12.3   |
| 3                                                  | 74.81          | 17.1                  | 10.5   |
| 4                                                  | 57.50          | 17.2                  | 13.7   |
| 5                                                  | 49.18          | 17.3                  | 16.1   |
| $\bar{\eta}$ (%)                                   | $12.8 \pm 2.1$ |                       |        |

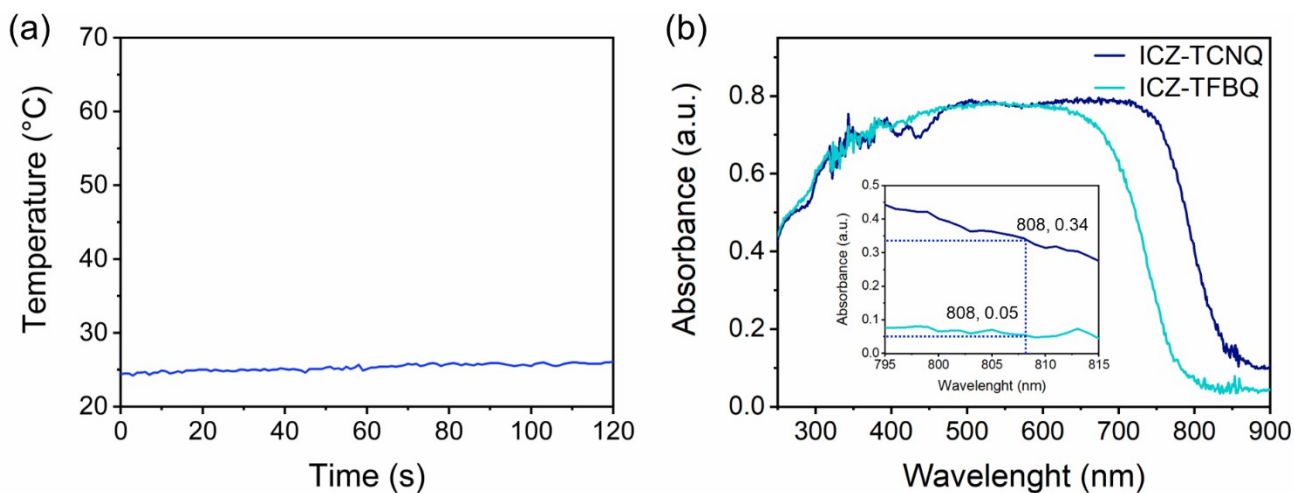

**Figure S9.** (a) Temperature change of blank under 0.5 W/cm<sup>2</sup> irradiation. (b) Absorption spectra of cocrystals with absorption values at 808 nm.

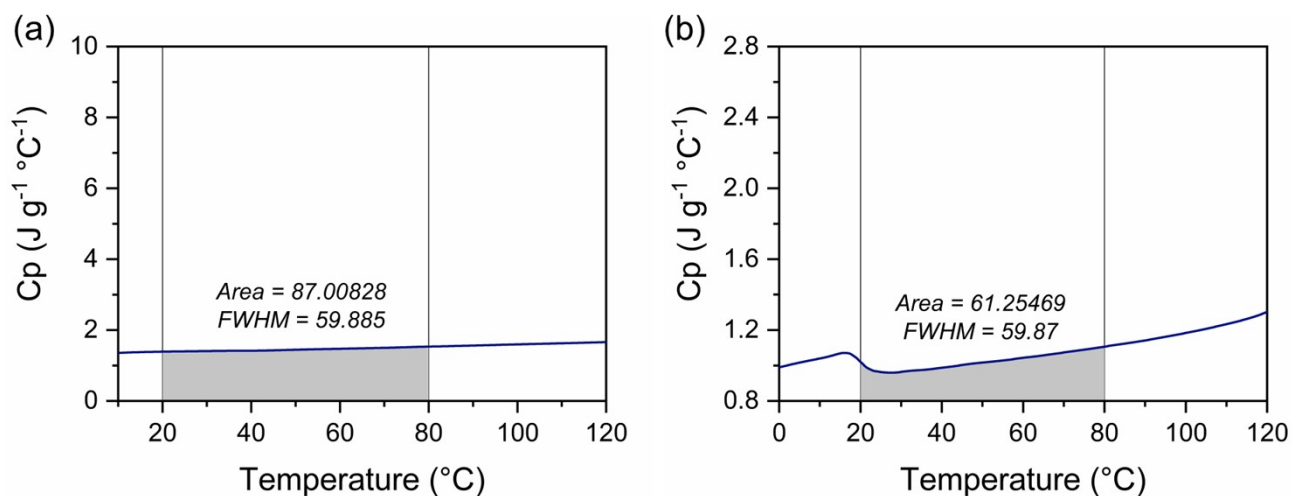

**Figure S10.** Specific heat capacity ( $C_p$ ) measurements for (a) **ICZ-TCNQ** and (b) **ICZ-TFBQ** cocrystals.

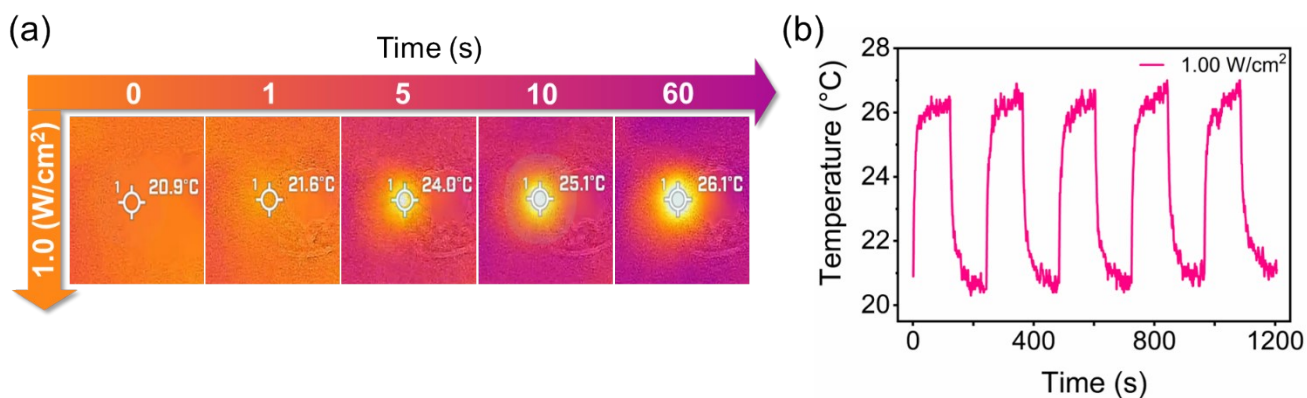

**Figure S11.** (a) **ICZ-TFBQ** under heating at  $1.0 \text{ W/cm}^2$  density power. (b) Heating-cooling curves for **ICZ-TFBQ**.

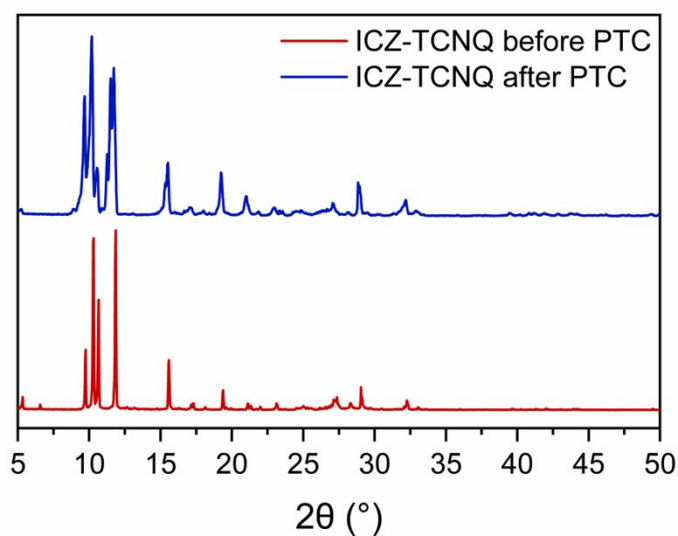

**Figure S12.** PXRD patterns of **ICZ-TCNQ** cocrystal before and after photothermal conversion experiments.



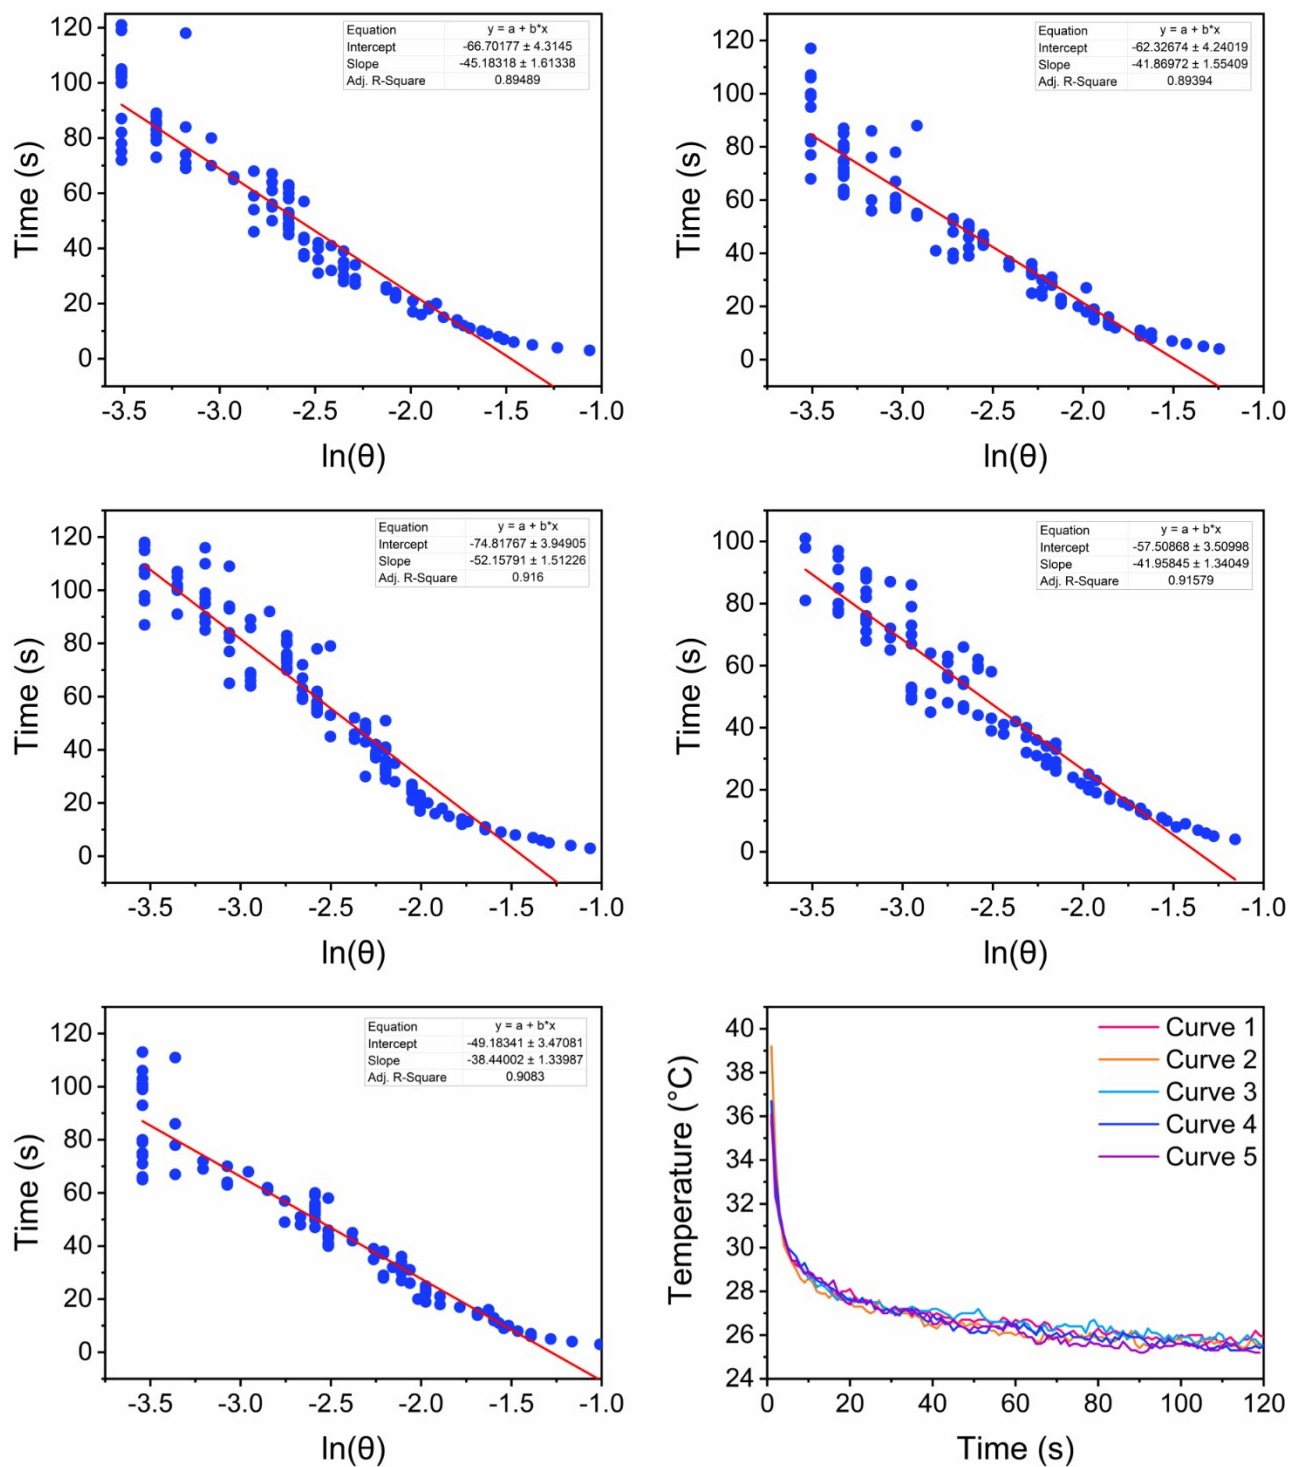

**Figure S13.** Linear fitting of time as function of the heat transfer coefficient and cooling curves of ICZ-TCNQ at 0.5 W/cm².

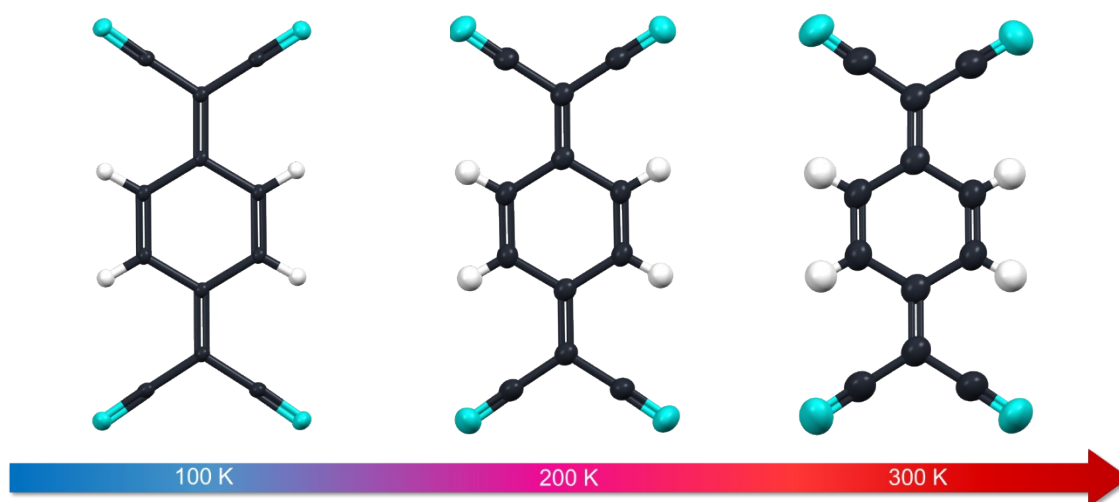

**Figure S14.** VT-SCXRD of ICZ-TCNQ cocrystal at 100 K, 200 K and 300 K.

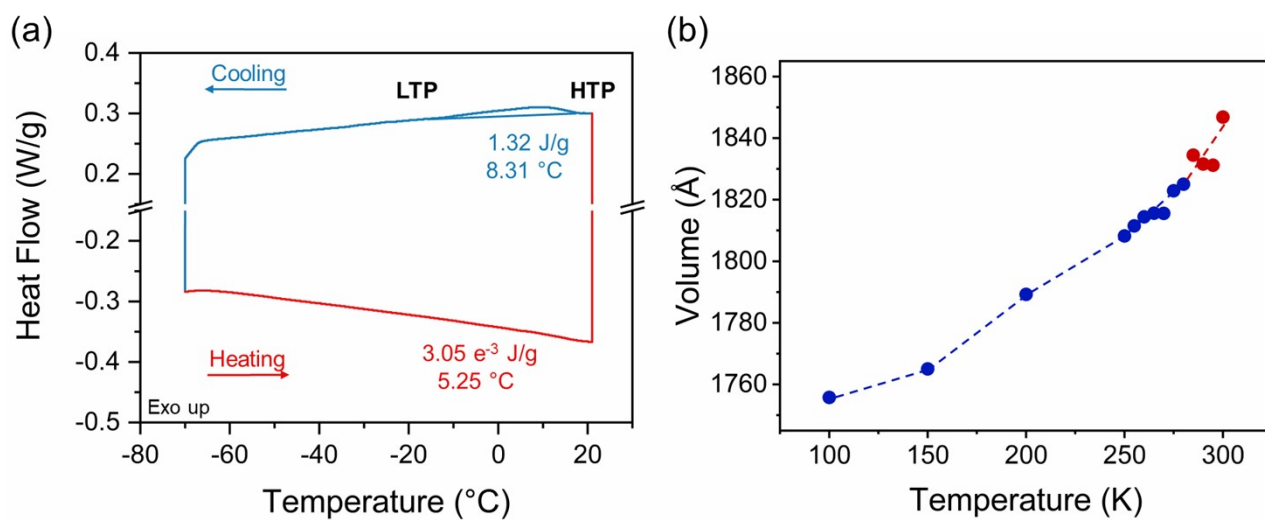

**Figure S15.** (a) DSC from ICZ-TFBQ cocrystal at low temperatures. (b) Cell volume changes as function of temperature.

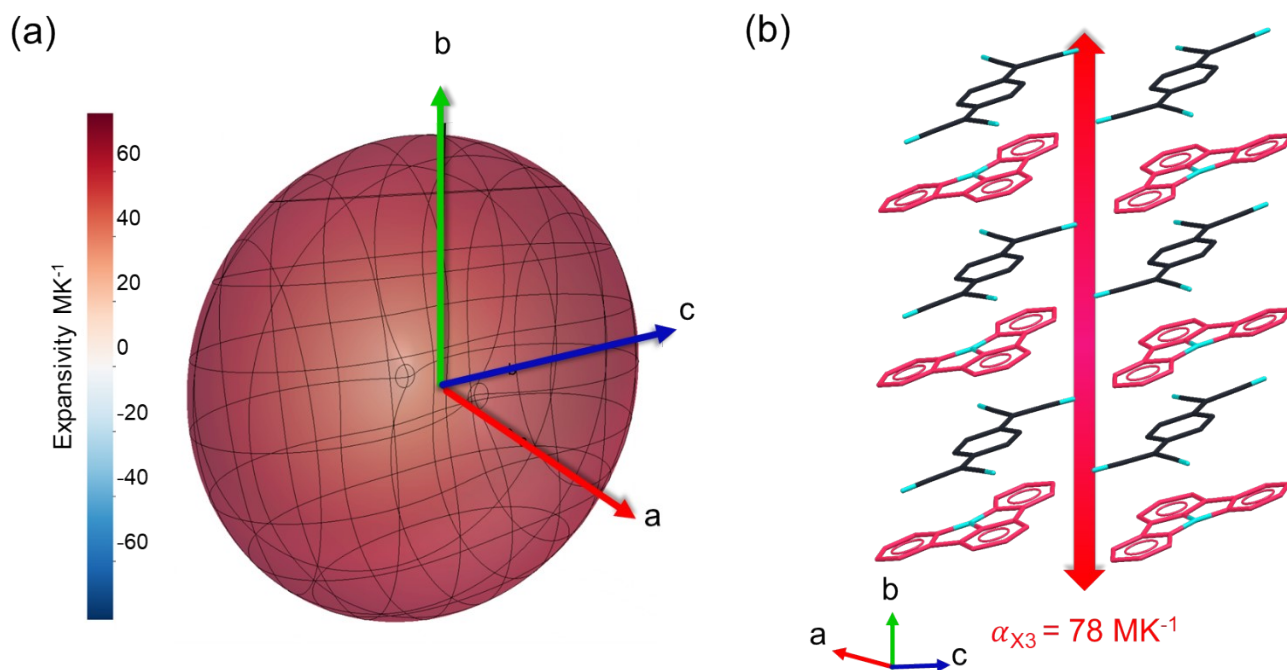

**Figure S16.** (a) Expansivity indicatrix for ICZ-TCNQ. (b) Crystalline packing of ICZ-TCNQ seen along the *b*-axis in the direction of the  $\pi$ -stacking between D/A molecules. The TE coefficient is displayed and illustrated with red arrows.

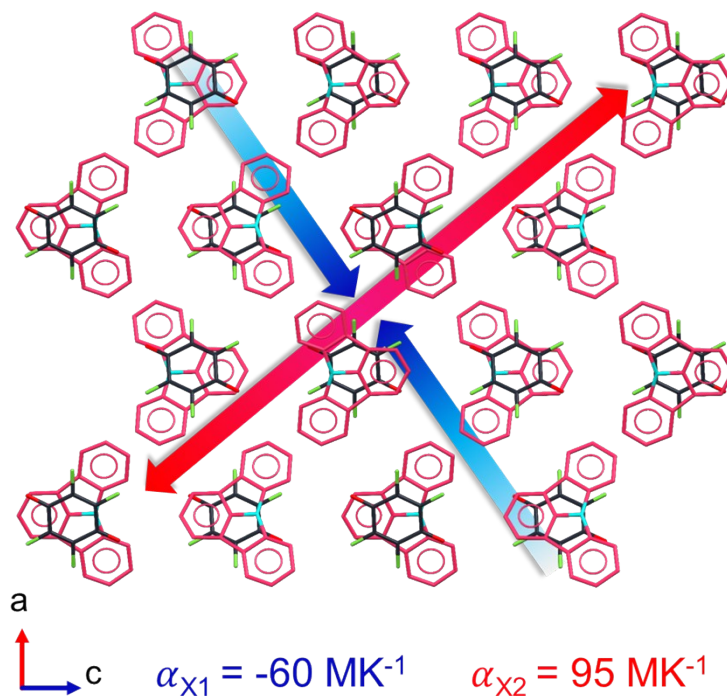

**Figure S17.** Crystalline packing of ICZ-TFBQ seen through the crystallographic *b*-axis (plane *ac*). The TE coefficients are displayed and illustrated with red and blue arrows.

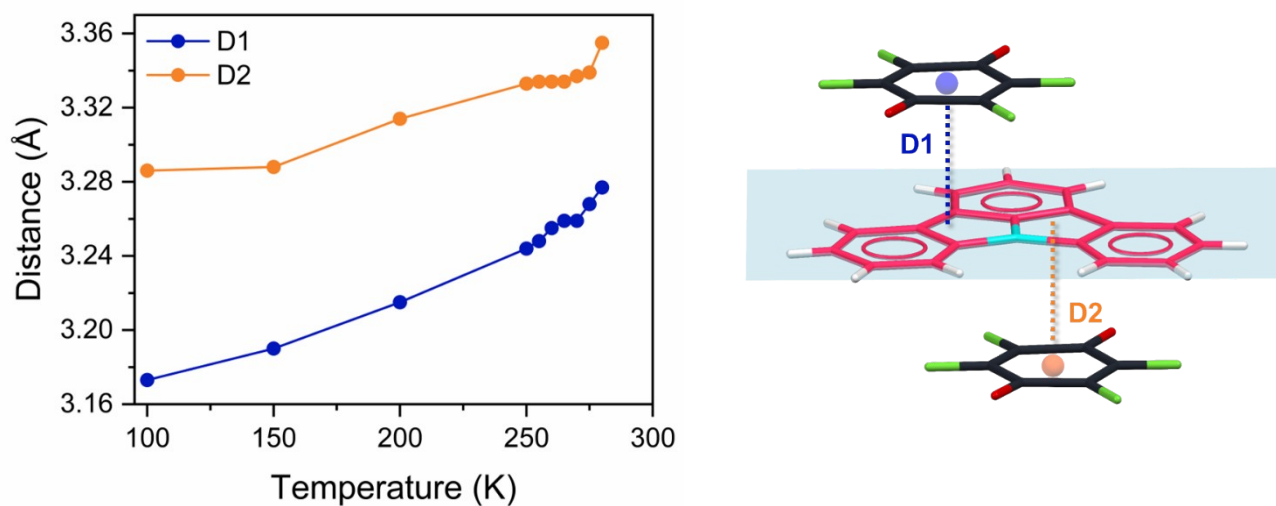

**Figure S18.** Changes in the  $\pi$ -stacking distances regarding temperature in the cocrystal **ICZ-TFBQ** from 100 K to 280 K.

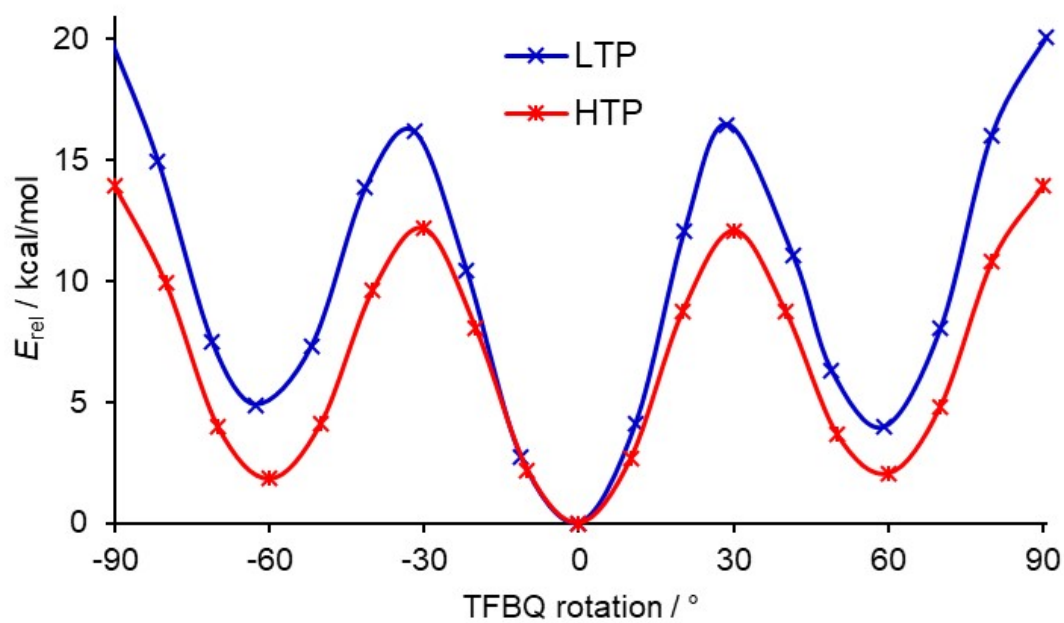

**Figure S19.** Energetic profile of the  $60^\circ$  rotations of **TFBQ** fragment within the plane in  $10^\circ$  increments.

**Table S4.** Crystal structure parameters for **ICZ-TCNQ** at 100 K, 200 K and 300 K.

| Identification code                              | <b>ICZTCNQ-100K</b>                         |                           | <b>ICZTCNQ-200K</b>                         |                           | <b>ICZTCNQ-300K</b>                         |                           |
|--------------------------------------------------|---------------------------------------------|---------------------------|---------------------------------------------|---------------------------|---------------------------------------------|---------------------------|
| Empirical formula                                | $C_{18}H_{11}N$ , $C_6F_4O_2$               |                           | $C_{18}H_{11}N$ , $C_6F_4O_2$               |                           | $C_{18}H_{11}N$ , $C_6F_4O_2$               |                           |
| Formula weight                                   | 445.47                                      |                           | 445.47                                      |                           | 445.47                                      |                           |
| Temperature (K)                                  | 100(2)                                      |                           | 200(2)                                      |                           | 300(2)                                      |                           |
| Wavelength (Å)                                   | 0.7288                                      |                           | 0.7288                                      |                           | 0.7288                                      |                           |
| Crystal system                                   | Monoclinic                                  |                           | Monoclinic                                  |                           | Monoclinic                                  |                           |
| Space group                                      | $P2_1/n$                                    |                           | $P2_1/n$                                    |                           | $P2_1/n$                                    |                           |
| Unit cell dimensions                             | a = 9.1770(9) Å                             | $\alpha = 90^\circ$       | a = 9.2049(10) Å                            | $\alpha = 90^\circ$       | a = 9.2145(11) Å                            | $\alpha = 90^\circ$       |
|                                                  | b = 7.0729(8) Å                             | $\beta = 96.048(4)^\circ$ | b = 7.1344(8) Å                             | $\beta = 96.141(4)^\circ$ | b = 7.1841(9) Å                             | $\beta = 96.263(4)^\circ$ |
|                                                  | c = 32.999(3) Å                             | $\gamma = 90^\circ$       | c = 33.241(4) Å                             | $\gamma = 90^\circ$       | c = 33.492(4) Å                             | $\gamma = 90^\circ$       |
| Volume (Å <sup>3</sup> )                         | 2130.0(4)                                   |                           | 2170.4(4)                                   |                           | 2203.9(5)                                   |                           |
| Z                                                | 4                                           |                           | 4                                           |                           | 4                                           |                           |
| Density (mg m <sup>-3</sup> )                    | 1.389                                       |                           | 1.363                                       |                           | 1.343                                       |                           |
| Absorption coefficient (mm <sup>-1</sup> )       | 0.088                                       |                           | 0.087                                       |                           | 0.085                                       |                           |
| F(000)                                           | 920                                         |                           | 920                                         |                           | 920                                         |                           |
| Crystal size (mm <sup>3</sup> )                  | 0.500 x 0.030 x 0.010                       |                           | 0.500 x 0.030 x 0.010                       |                           | 0.500 x 0.030 x 0.010                       |                           |
| Theta range for data collection                  | 1.273 to 31.424°                            |                           | 2.302 to 27.929°                            |                           | 2.298 to 26.098°                            |                           |
| Index ranges                                     | -13 ≤ h ≤ 13                                |                           | -11 ≤ h ≤ 11                                |                           | -11 ≤ h ≤ 11                                |                           |
|                                                  | -10 ≤ k ≤ 10                                |                           | -9 ≤ k ≤ 9                                  |                           | -8 ≤ k ≤ 8                                  |                           |
|                                                  | -47 ≤ l ≤ 47                                |                           | -42 ≤ l ≤ 42                                |                           | -40 ≤ l ≤ 40                                |                           |
| Reflections collected                            | 69025                                       |                           | 56733                                       |                           | 49261                                       |                           |
| Independent reflections                          | 6508 [R(int) = 0.0503]                      |                           | 4780 [R(int) = 0.0662]                      |                           | 4048 [R(int) = 0.0568]                      |                           |
| Completeness to theta = 25.242°                  | 99.8 %                                      |                           | 99.8 %                                      |                           | 99.7 %                                      |                           |
| Absorption correction                            | Semi-empirical from equivalents             |                           | Semi-empirical from equivalents             |                           | Semi-empirical from equivalents             |                           |
| Max. and min. transmission                       | 0.999 and 0.950                             |                           | 0.999 and 0.941                             |                           | 0.999 and 0.938                             |                           |
| Refinement method                                | Full-matrix least-squares on F <sup>2</sup> |                           | Full-matrix least-squares on F <sup>2</sup> |                           | Full-matrix least-squares on F <sup>2</sup> |                           |
| Data / restraints / parameters                   | 6508 / 0 / 316                              |                           | 4780 / 0 / 316                              |                           | 4048 / 0 / 316                              |                           |
| Goodness-of-fit on F <sup>2</sup>                | 1.064                                       |                           | 1.049                                       |                           | 1.064                                       |                           |
| Final R indices [I>2sigma(I)]                    | R1 = 0.0412                                 |                           | R1 = 0.0389                                 |                           | R1 = 0.0387                                 |                           |
|                                                  | wR2 = 0.1066                                |                           | wR2 = 0.0951                                |                           | wR2 = 0.0943                                |                           |
| R indices (all data)                             | R1 = 0.0470                                 |                           | R1 = 0.048                                  |                           | R1 = 0.0479                                 |                           |
|                                                  | wR2 = 0.1110                                |                           | wR2 = 0.1021                                |                           | wR2 = 0.1006                                |                           |
| Extinction coefficient                           | n/a                                         |                           | n/a                                         |                           | n/a                                         |                           |
| Largest diff. peak and hole (e.Å <sup>-3</sup> ) | 0.451 and -0.283                            |                           | 0.208 and -0.201                            |                           | 0.148 and -0.175                            |                           |

**Table S5.** Crystal structure parameters for **ICZ-TFBQ** at 100 K, 150 K and 200 K.

| Identification code                              | <b>ICZTFBQ-100K</b>                         |                             | <b>ICZTFBQ-150K</b>                         |                           | <b>ICZTFBQ-200K</b>                         |                           |
|--------------------------------------------------|---------------------------------------------|-----------------------------|---------------------------------------------|---------------------------|---------------------------------------------|---------------------------|
| Empirical formula                                | $C_{18}H_{11}N, C_6F_4O_2$                  |                             | $C_{18}H_{11}N, C_6F_4O_2$                  |                           | $C_{18}H_{11}N, C_6F_4O_2$                  |                           |
| Formula weight                                   | 421.34                                      |                             | 421.34                                      |                           | 421.34                                      |                           |
| Temperature (K)                                  | 100(2)                                      |                             | 150(2)                                      |                           | 200(2)                                      |                           |
| Wavelength (Å)                                   | 0.71073                                     |                             | 0.71073                                     |                           | 0.71073                                     |                           |
| Crystal system                                   | Monoclinic                                  |                             | Monoclinic                                  |                           | Monoclinic                                  |                           |
| Space group                                      | $P2_1/c$                                    |                             | $P2_1/c$                                    |                           | $P2_1/c$                                    |                           |
| Unit cell dimensions                             | a = 15.4910(6) Å                            | $\alpha = 90^\circ$         | a = 15.480(2) Å                             | $\alpha = 90^\circ$       | a = 15.5166(8) Å                            | $\alpha = 90^\circ$       |
|                                                  | b = 6.8140(2) Å                             | $\beta = 91.2360(10)^\circ$ | b = 6.8416(7) Å                             | $\beta = 90.887(4)^\circ$ | b = 6.9014(3) Å                             | $\beta = 90.931(2)^\circ$ |
|                                                  | c = 16.6374(6) Å                            | $\gamma = 90^\circ$         | c = 16.668(2) Å                             | $\gamma = 90^\circ$       | c = 16.7105(10) Å                           | $\gamma = 90^\circ$       |
| Volume (Å <sup>3</sup> )                         | 1755.76(11)                                 |                             | 1765.1(4)                                   |                           | 1789.23(16)                                 |                           |
| Z                                                | 4                                           |                             | 4                                           |                           | 4                                           |                           |
| Density (mg m <sup>-3</sup> )                    | 1.594                                       |                             | 1.586                                       |                           | 1.564                                       |                           |
| Absorption coefficient (mm <sup>-1</sup> )       | 0.131                                       |                             | 0.130                                       |                           | 0.128                                       |                           |
| F(000)                                           | 856                                         |                             | 856                                         |                           | 856                                         |                           |
| Crystal size (mm <sup>3</sup> )                  | 0.359 x 0.356 x 0.338                       |                             | 0.359 x 0.356 x 0.338                       |                           | 0.359 x 0.356 x 0.338                       |                           |
| Theta range for data collection                  | 3.231 to 29.181°                            |                             | 3.219 to 25.246°                            |                           | 3.194 to 29.225°                            |                           |
| Index ranges                                     | -21 ≤ h ≤ 21                                |                             | -17 ≤ h ≤ 17                                |                           | -21 ≤ h ≤ 21                                |                           |
|                                                  | 0 ≤ k ≤ 9                                   |                             | 0 ≤ k ≤ 7                                   |                           | 0 ≤ k ≤ 9                                   |                           |
|                                                  | 0 ≤ l ≤ 22                                  |                             | 0 ≤ l ≤ 19                                  |                           | 0 ≤ l ≤ 22                                  |                           |
| Reflections collected                            | 4797                                        |                             | 2503                                        |                           | 4838                                        |                           |
| Independent reflections                          | 4797 [R(int) = 0.0445]                      |                             | 2503 [R(int) = 0.1635]                      |                           | 4838 [R(int) = 0.0505]                      |                           |
| Completeness to theta = 25.242°                  | 99.4 %                                      |                             | 78.3 %                                      |                           | 99.4 %                                      |                           |
| Absorption correction                            | Semi-empirical from equivalents             |                             | Semi-empirical from equivalents             |                           | Semi-empirical from equivalents             |                           |
| Max. and min. transmission                       | 0.7458 and 0.6912                           |                             | 0.7452 and 0.5986                           |                           | 0.7458 and 0.6842                           |                           |
| Refinement method                                | Full-matrix least-squares on F <sup>2</sup> |                             | Full-matrix least-squares on F <sup>2</sup> |                           | Full-matrix least-squares on F <sup>2</sup> |                           |
| Data / restraints / parameters                   | 4797 / 0 / 281                              |                             | 2503 / 0 / 281                              |                           | 4838 / 0 / 281                              |                           |
| Goodness-of-fit on F <sup>2</sup>                | 1.109                                       |                             | 1.214                                       |                           | 1.139                                       |                           |
| Final R indices [I>2sigma(I)]                    | R1 = 0.0472                                 |                             | R1 = 0.0999                                 |                           | R1 = 0.0543                                 |                           |
|                                                  | wR2 = 0.1064                                |                             | wR2 = 0.2356                                |                           | wR2 = 0.1090                                |                           |
| R indices (all data)                             | R1 = 0.0576                                 |                             | R1 = 0.1281                                 |                           | R1 = 0.0865                                 |                           |
|                                                  | wR2 = 0.1131                                |                             | wR2 = 0.2547                                |                           | wR2 = 0.1236                                |                           |
| Extinction coefficient                           | n/a                                         |                             | n/a                                         |                           | n/a                                         |                           |
| Largest diff. peak and hole (e.Å <sup>-3</sup> ) | 0.323 and -0.306                            |                             | 0.401 and -0.375                            |                           | 0.272 and -0.230                            |                           |

**Table S6.** Crystal structure parameters for **ICZ-TFBQ** at 250 K, 255 K and 260 K.

| Identification code                              | <b>ICZTFBQ-250K</b>                         |                           | <b>ICZTFBQ-255K</b>                         |                           | <b>ICZTFBQ-260K</b>                         |                           |
|--------------------------------------------------|---------------------------------------------|---------------------------|---------------------------------------------|---------------------------|---------------------------------------------|---------------------------|
| Empirical formula                                | $C_{18}H_{11}N, C_6F_4O_2$                  |                           | $C_{18}H_{11}N, C_6F_4O_2$                  |                           | $C_{18}H_{11}N, C_6F_4O_2$                  |                           |
| Formula weight                                   | 421.34                                      |                           | 421.34                                      |                           | 421.34                                      |                           |
| Temperature (K)                                  | 250(2)                                      |                           | 255(2)                                      |                           | 260(2)                                      |                           |
| Wavelength (Å)                                   | 0.71073                                     |                           | 0.71073                                     |                           | 0.71073                                     |                           |
| Crystal system                                   | Monoclinic                                  |                           | Monoclinic                                  |                           | Monoclinic                                  |                           |
| Space group                                      | $P2_1/c$                                    |                           | $P2_1/c$                                    |                           | $P2_1/c$                                    |                           |
| Unit cell dimensions                             | a= 15.5003(12)Å                             | $\alpha = 90^\circ$       | a=15.5007(12) Å                             | $\alpha = 90^\circ$       | a=15.5010(13) Å                             | $\alpha = 90^\circ$       |
|                                                  | b= 6.9661(5) Å                              | $\beta = 91.585(2)^\circ$ | b=6.9749(5) Å                               | $\beta = 90.544(2)^\circ$ | b= 6.9832(5) Å                              | $\beta = 90.504(2)^\circ$ |
|                                                  | c= 16.7470(13)Å                             | $\gamma = 90^\circ$       | c=16.7557(13) Å                             | $\gamma = 90^\circ$       | c=16.7625(14) Å                             | $\gamma = 90^\circ$       |
| Volume (Å <sup>3</sup> )                         | 1808.2(2)                                   |                           | 1811.5(2)                                   |                           | 1814.4(3)                                   |                           |
| Z                                                | 4                                           |                           | 4                                           |                           | 4                                           |                           |
| Density (mg m <sup>-3</sup> )                    | 1.548                                       |                           | 1.545                                       |                           | 1.542                                       |                           |
| Absorption coefficient (mm <sup>-1</sup> )       | 0.127                                       |                           | 0.127                                       |                           | 0.126                                       |                           |
| F(000)                                           | 856                                         |                           | 856                                         |                           | 856                                         |                           |
| Crystal size (mm <sup>3</sup> )                  | 0.394 x 0.346 x 0.342                       |                           | 0.394 x 0.346 x 0.342                       |                           | 0.394 x 0.346 x 0.342                       |                           |
| Theta range for data collection                  | 3.167 to 23.265°                            |                           | 3.164 to 23.281°                            |                           | 3.160 to 23.292°                            |                           |
| Index ranges                                     | -17 ≤ h ≤ 17                                |                           | -17 ≤ h ≤ 17                                |                           | -17 ≤ h ≤ 17                                |                           |
|                                                  | -7 ≤ k ≤ 7                                  |                           | -7 ≤ k ≤ 7                                  |                           | -7 ≤ k ≤ 7                                  |                           |
|                                                  | -18 ≤ l ≤ 18                                |                           | -18 ≤ l ≤ 18                                |                           | -18 ≤ l ≤ 18                                |                           |
| Reflections collected                            | 11825                                       |                           | 11834                                       |                           | 11829                                       |                           |
| Independent reflections                          | 2454 [R(int) = 0.1299]                      |                           | 2463 [R(int) = 0.1296]                      |                           | 2467 [R(int) = 0.1394]                      |                           |
| Completeness to theta = 25.242°                  | 94.4 %                                      |                           | 94.5 %                                      |                           | 94.3 %                                      |                           |
| Refinement method                                | Full-matrix least-squares on F <sup>2</sup> |                           | Full-matrix least-squares on F <sup>2</sup> |                           | Full-matrix least-squares on F <sup>2</sup> |                           |
| Data / restraints / parameters                   | 2454 / 0 / 280                              |                           | 2463 / 0 / 280                              |                           | 2467 / 0 / 280                              |                           |
| Goodness-of-fit on F <sup>2</sup>                | 1.220                                       |                           | 1.247                                       |                           | 1.247                                       |                           |
| Final R indices [I>2sigma(I)]                    | R1 = 0.1174                                 |                           | R1 = 0.1180                                 |                           | R1 = 0.1242                                 |                           |
|                                                  | wR2 = 0.2270                                |                           | wR2 = 0.2327                                |                           | wR2 = 0.2342                                |                           |
| R indices (all data)                             | R1 = 0.1691                                 |                           | R1 = 0.1729                                 |                           | R1 = 0.1784                                 |                           |
|                                                  | wR2 = 0.2540                                |                           | wR2 = 0.2610                                |                           | wR2 = 0.2614                                |                           |
| Extinction coefficient                           | n/a                                         |                           | n/a                                         |                           | n/a                                         |                           |
| Largest diff. peak and hole (e.Å <sup>-3</sup> ) | 0.283 and -0.294                            |                           | 0.262 and -0.384                            |                           | 0.290 and -0.364                            |                           |

**Table S7.** Crystal structure parameters for **ICZ-TFBQ** at 265 K, 270 K and 275 K.

| Identification code                              | <b>ICZTFBQ-265K</b>                         |                           | <b>ICZTFBQ-270K</b>                         |                           | <b>ICZTFBQ-275K</b>                         |                           |
|--------------------------------------------------|---------------------------------------------|---------------------------|---------------------------------------------|---------------------------|---------------------------------------------|---------------------------|
| Empirical formula                                | $C_{18}H_{11}N, C_6F_4O_2$                  |                           | $C_{18}H_{11}N, C_6F_4O_2$                  |                           | $C_{18}H_{11}N, C_6F_4O_2$                  |                           |
| Formula weight                                   | 421.34                                      |                           | 421.34                                      |                           | 421.34                                      |                           |
| Temperature (K)                                  | 265(2)                                      |                           | 270(2)                                      |                           | 275(2)                                      |                           |
| Wavelength (Å)                                   | 0.71073                                     |                           | 0.71073                                     |                           | 0.71073                                     |                           |
| Crystal system                                   | Monoclinic                                  |                           | Monoclinic                                  |                           | Monoclinic                                  |                           |
| Space group                                      | $P2_1/c$                                    |                           | $P2_1/c$                                    |                           | $P2_1/c$                                    |                           |
| Unit cell dimensions                             | a=15.4951(13) Å                             | $\alpha = 90^\circ$       | a=15.4846(13) Å                             | $\alpha = 90^\circ$       | a=15.4962(13) Å                             | $\alpha = 90^\circ$       |
|                                                  | b= 6.9903(5) Å                              | $\beta = 90.455(2)^\circ$ | b=6.9953(5) Å                               | $\beta = 90.398(2)^\circ$ | b= 7.0097(5) Å                              | $\beta = 90.350(2)^\circ$ |
|                                                  | c=16.7629(14) Å                             | $\gamma = 90^\circ$       | c=16.7616(14) Å                             | $\gamma = 90^\circ$       | c=16.7818(14) Å                             | $\gamma = 90^\circ$       |
| Volume (Å <sup>3</sup> )                         | 1815.6(3)                                   |                           | 1815.6(3)                                   |                           | 1822.9(3)                                   |                           |
| Z                                                | 4                                           |                           | 4                                           |                           | 4                                           |                           |
| Density (mg m <sup>-3</sup> )                    | 1.541                                       |                           | 1.541                                       |                           | 1.535                                       |                           |
| Absorption coefficient (mm <sup>-1</sup> )       | 0.126                                       |                           | 0.126                                       |                           | 0.126                                       |                           |
| F(000)                                           | 856                                         |                           | 856                                         |                           | 856                                         |                           |
| Crystal size (mm <sup>3</sup> )                  | 0.394 x 0.346 x 0.342                       |                           | 0.394 x 0.346 x 0.342                       |                           | 0.394 x 0.346 x 0.342                       |                           |
| Theta range for data collection                  | 3.157 to 23.280°                            |                           | 3.156 to 23.253°                            |                           | 2.427 to 23.276°                            |                           |
| Index ranges                                     | $-17 \leq h \leq 17$                        |                           | $-17 \leq h \leq 17$                        |                           | $-17 \leq h \leq 17$                        |                           |
|                                                  | $-7 \leq k \leq 7$                          |                           | $-7 \leq k \leq 7$                          |                           | $-7 \leq k \leq 7$                          |                           |
|                                                  | $-18 \leq l \leq 18$                        |                           | $-18 \leq l \leq 18$                        |                           | $-18 \leq l \leq 18$                        |                           |
| Reflections collected                            | 11873                                       |                           | 10099                                       |                           | 11910                                       |                           |
| Independent reflections                          | 2463 [R(int) = 0.1419]                      |                           | 2414 [R(int) = 0.0715]                      |                           | 2472 [R(int) = 0.1363]                      |                           |
| Completeness to theta = 25.242°                  | 94.2 %                                      |                           | 92.7 %                                      |                           | 94.2 %                                      |                           |
| Refinement method                                | Full-matrix least-squares on F <sup>2</sup> |                           | Full-matrix least-squares on F <sup>2</sup> |                           | Full-matrix least-squares on F <sup>2</sup> |                           |
| Data / restraints / parameters                   | 2463 / 0 / 280                              |                           | 2414 / 0 / 280                              |                           | 2472 / 0 / 280                              |                           |
| Goodness-of-fit on F <sup>2</sup>                | 1.243                                       |                           | 1.278                                       |                           | 1.211                                       |                           |
| Final R indices [I>2sigma(I)]                    | R1 = 0.1329                                 |                           | R1 = 0.1220                                 |                           | R1 = 0.1279                                 |                           |
|                                                  | wR2 = 0.2463                                |                           | wR2 = 0.2376                                |                           | wR2 = 0.2577                                |                           |
| R indices (all data)                             | R1 = 0.1914                                 |                           | R1 = 0.1685                                 |                           | R1 = 0.1911                                 |                           |
|                                                  | wR2 = 0.2745                                |                           | wR2 = 0.2616                                |                           | wR2 = 0.2933                                |                           |
| Extinction coefficient                           | n/a                                         |                           | n/a                                         |                           | n/a                                         |                           |
| Largest diff. peak and hole (e.Å <sup>-3</sup> ) | 0.276 and -0.295                            |                           | 0.248 and -0.253                            |                           | 0.291 and -0.277                            |                           |



**Table S8.** Crystal structure parameters for **ICZ-TFBQ** at 280 K, 285 K and 290 K.

| Identification code                              | <b>ICZTFBQ-280K</b>                         |                           | <b>ICZTFBQ-285K</b>                         |                     | <b>ICZTFBQ-290K</b>                         |                     |
|--------------------------------------------------|---------------------------------------------|---------------------------|---------------------------------------------|---------------------|---------------------------------------------|---------------------|
| Empirical formula                                | $C_{18}H_{11}N, C_6F_4O_2$                  |                           | $C_{18}H_{11}N, C_6F_4O_2$                  |                     | $C_{18}H_{11}N, C_6F_4O_2$                  |                     |
| Formula weight                                   | 421.34                                      |                           | 421.34                                      |                     | 421.34                                      |                     |
| Temperature (K)                                  | 280(2)                                      |                           | 285(2)                                      |                     | 290(2)                                      |                     |
| Wavelength (Å)                                   | 0.71073                                     |                           | 0.71073                                     |                     | 0.71073                                     |                     |
| Crystal system                                   | Monoclinic                                  |                           | Orthorhombic                                |                     | Orthorhombic                                |                     |
| Space group                                      | $P2_1/c$                                    |                           | $Pbcn$                                      |                     | $Pbcn$                                      |                     |
| Unit cell dimensions                             | a=15.4906(14) Å                             | $\alpha = 90^\circ$       | a=7.0361(7) Å                               | $\alpha = 90^\circ$ | a=7.0399(6) Å                               | $\alpha = 90^\circ$ |
|                                                  | b= 7.0182(5) Å                              | $\beta = 90.307(3)^\circ$ | b=16.8128(18) Å                             | $\beta = 90^\circ$  | b= 16.8012(17) Å                            | $\beta = 90^\circ$  |
|                                                  | c=16.7875(15) Å                             | $\gamma = 90^\circ$       | c=15.5075(17) Å                             | $\gamma = 90^\circ$ | c=15.4855(16) Å                             | $\gamma = 90^\circ$ |
| Volume (Å <sup>3</sup> )                         | 1825.0(3)                                   |                           | 1834.5(3)                                   |                     | 1831.6(3)                                   |                     |
| Z                                                | 4                                           |                           | 4                                           |                     | 4                                           |                     |
| Density (mg m <sup>-3</sup> )                    | 1.533                                       |                           | 1.526                                       |                     | 1.528                                       |                     |
| Absorption coefficient (mm <sup>-1</sup> )       | 0.126                                       |                           | 0.125                                       |                     | 0.125                                       |                     |
| F(000)                                           | 856                                         |                           | 856                                         |                     | 856                                         |                     |
| Crystal size (mm <sup>3</sup> )                  | 0.394 x 0.346 x 0.342                       |                           | 0.394 x 0.346 x 0.342                       |                     | 0.394 x 0.346 x 0.342                       |                     |
| Theta range for data collection                  | 2.426 to 23.286°                            |                           | 2.423 to 23.256°                            |                     | 2.424 to 23.256°                            |                     |
| Index ranges                                     | -17 ≤ h ≤ 17                                |                           | -7 ≤ h ≤ 7                                  |                     | -7 ≤ h ≤ 7                                  |                     |
|                                                  | -7 ≤ k ≤ 7                                  |                           | -18 ≤ k ≤ 18                                |                     | -18 ≤ k ≤ 18                                |                     |
|                                                  | -18 ≤ l ≤ 18                                |                           | -17 ≤ l ≤ 17                                |                     | -17 ≤ l ≤ 17                                |                     |
| Reflections collected                            | 10857                                       |                           | 8959                                        |                     | 9399                                        |                     |
| Independent reflections                          | 2465 [R(int) = 0.0819]                      |                           | 1277 [R(int) = 0.1146]                      |                     | 1271 [R(int) = 0.1082]                      |                     |
| Completeness to theta = 25.242°                  | 93.7 %                                      |                           | 96.5 %                                      |                     | 96.4 %                                      |                     |
| Refinement method                                | Full-matrix least-squares on F <sup>2</sup> |                           | Full-matrix least-squares on F <sup>2</sup> |                     | Full-matrix least-squares on F <sup>2</sup> |                     |
| Data / restraints / parameters                   | 2465 / 0 / 281                              |                           | 1277 / 474 / 305                            |                     | 1271 / 456 / 304                            |                     |
| Goodness-of-fit on F <sup>2</sup>                | 1.255                                       |                           | 1.916                                       |                     | 1.127                                       |                     |
| Final R indices [I>2sigma(I)]                    | R1 = 0.1253                                 |                           | R1 = 0.1612                                 |                     | R1 = 0.1386                                 |                     |
|                                                  | wR2 = 0.2087                                |                           | wR2 = 0.4431                                |                     | wR2 = 0.2535                                |                     |
| R indices (all data)                             | R1 = 0.1845                                 |                           | R1 = 0.2114                                 |                     | R1 = 0.1888                                 |                     |
|                                                  | wR2 = 0.2344                                |                           | wR2 = 0.4811                                |                     | wR2 = 0.2789                                |                     |
| Extinction coefficient                           | 0.021(3)                                    |                           | 0.06(3)                                     |                     | n/a                                         |                     |
| Largest diff. peak and hole (e.Å <sup>-3</sup> ) | 0.210 and -0.233                            |                           | 0.334 and -0.367                            |                     | 0.249 and -0.284                            |                     |

**Table S9.** Crystal structure parameters for **ICZ-TFBQ** at 295 K and 300 K.

| Identification code                              | <b>ICZTFBQ-295K</b>                         |                     | <b>ICZTFBQ-300K</b>                         |                     |
|--------------------------------------------------|---------------------------------------------|---------------------|---------------------------------------------|---------------------|
| Empirical formula                                | $C_{18}H_{11}N$ , $C_6F_4O_2$               |                     | $C_{18}H_{11}N$ , $C_6F_4O_2$               |                     |
| Formula weight                                   | 421.34                                      |                     | 421.34                                      |                     |
| Temperature (K)                                  | 295(2)                                      |                     | 298(2)                                      |                     |
| Wavelength (Å)                                   | 0.71073                                     |                     | 0.71073                                     |                     |
| Crystal system                                   | Orthorhombic                                |                     | Orthorhombic                                |                     |
| Space group                                      | <i>Pbcn</i>                                 |                     | <i>Pbcn</i>                                 |                     |
| Unit cell dimensions                             | a=7.0461(6) Å                               | $\alpha = 90^\circ$ | a=7.0571(11) Å                              | $\alpha = 90^\circ$ |
|                                                  | b=16.7994(17) Å                             | $\beta = 90^\circ$  | b=16.847(3) Å                               | $\beta = 90^\circ$  |
|                                                  | c=15.4702(16) Å                             | $\gamma = 90^\circ$ | c=15.534(3) Å                               | $\gamma = 90^\circ$ |
| Volume (Å <sup>3</sup> )                         | 1831.2(3)                                   |                     | 1846.9(5)                                   |                     |
| Z                                                | 4                                           |                     | 4                                           |                     |
| Density (mg m <sup>-3</sup> )                    | 1.528                                       |                     | 1.515                                       |                     |
| Absorption coefficient (mm <sup>-1</sup> )       | 0.125                                       |                     | 0.124                                       |                     |
| F(000)                                           | 856                                         |                     | 856                                         |                     |
| Crystal size (mm <sup>3</sup> )                  | 0.394 x 0.346 x 0.342                       |                     | 0.359 x 0.346 x 0.338                       |                     |
| Theta range for data collection                  | 3.135 to 23.270°                            |                     | 3.130 to 28.699°                            |                     |
| Index ranges                                     | $-7 \leq h \leq 7$                          |                     | $-9 \leq h \leq 9$                          |                     |
|                                                  | $-18 \leq k \leq 18$                        |                     | $-22 \leq k \leq 22$                        |                     |
|                                                  | $-17 \leq l \leq 17$                        |                     | $-20 \leq l \leq 20$                        |                     |
| Reflections collected                            | 10264                                       |                     | 54036                                       |                     |
| Independent reflections                          | 1283 [R(int) = 0.0822]                      |                     | 2373 [R(int) = 0.0451]                      |                     |
| Completeness to theta = 25.242°                  | 97.0 %                                      |                     | 98.8 %                                      |                     |
| Refinement method                                | Full-matrix least-squares on F <sup>2</sup> |                     | Full-matrix least-squares on F <sup>2</sup> |                     |
| Data / restraints / parameters                   | 1283 / 366 / 304                            |                     | 2373 / 366 / 305                            |                     |
| Goodness-of-fit on F <sup>2</sup>                | 1.305                                       |                     | 1.059                                       |                     |
| Final R indices [I>2sigma(I)]                    | R1 = 0.0987                                 |                     | R1 = 0.0487                                 |                     |
|                                                  | wR2 = 0.1537                                |                     | wR2 = 0.0979                                |                     |
| R indices (all data)                             | R1 = 0.1552                                 |                     | R1 = 0.0953                                 |                     |
|                                                  | wR2 = 0.1762                                |                     | wR2 = 0.1308                                |                     |
| Extinction coefficient                           | n/a                                         |                     | 0.054(7)                                    |                     |
| Largest diff. peak and hole (e.Å <sup>-3</sup> ) | 0.199 and -0.212                            |                     | 0.140 and -0.138                            |                     |

## References

- (S1) Bielecki, A.; Burum, D. P. Temperature Dependence of  $^{207}\text{Pb}$  MAS Spectra of Solid Lead Nitrate. An Accurate, Sensitive Thermometer for Variable-Temperature MAS. *Journal of Magnetic Resonance, Series A* **1995**, *116* (2), 215–220. <https://doi.org/10.1006/jmra.1995.0010>.
- (S2) Clark, S. J.; Segall, M. D.; Pickard, C. J.; Hasnip, P. J.; Probert, M. I. J.; Refson, K.; Payne, M. C. First Principles Methods Using CASTEP. *Zeitschrift für Kristallographie - Crystalline Materials* **2005**, *220* (5–6), 567–570. <https://doi.org/10.1524/zkri.220.5.567.65075>.
- (S3) Perdew, J. P.; Burke, K.; Ernzerhof, M. Generalized Gradient Approximation Made Simple. *Phys. Rev. Lett.* **1996**, *77* (18), 3865–3868. <https://doi.org/10.1103/PhysRevLett.77.3865>.
- (S4) Vanderbilt, D. Soft Self-Consistent Pseudopotentials in a Generalized Eigenvalue Formalism. *Phys. Rev. B* **1990**, *41* (11), 7892–7895. <https://doi.org/10.1103/PhysRevB.41.7892>.
- (S5) Monkhorst, H. J. Special Points for Brillouin-Zone Integrations. *Phys. Rev. B* **1976**, *13* (12), 5188–5192. <https://doi.org/10.1103/PhysRevB.13.5188>.
- (S6) Tkatchenko, A.; Scheffler, M. Accurate Molecular Van Der Waals Interactions from Ground-State Electron Density and Free-Atom Reference Data. *Phys. Rev. Lett.* **2009**, *102* (7), 073005. <https://doi.org/10.1103/PhysRevLett.102.073005>.
- (S7) Frisch, M. J.; Trucks, G. W.; Schlegel, H. B.; Scuseria, G. E.; Robb, M. A.; Cheeseman, J. R.; Scalmani, G.; Barone, V.; Mennucci, B.; Petersson, G. A.; Nakatsuji, H.; Caricato, M.; Li, X.; Hratchian, H. P.; Izmaylov, A. F.; Bloino, J.; Zheng, G.; Sonnenberg, J. L.; Hada, M.; Ehara, M.; Toyota, K.; Fukuda, R.; Hasegawa, J.; Ishida, M.; Nakajima, T.; Honda, Y.; Kitao, O.; Nakai, H.; Vreven, T.; Montgomery, Jr., J. A.; Peralta, J. E.; Ogliaro, F.; Bearpark, M.; Heyd, J. J.; Brothers, E.; Kudin, K. N.; Staroverov, V. N.; Kobayashi, R.; Normand, J.; Raghavachari, K.; Rendell, A.; Burant, J. C.; Iyengar, S. S.; Tomasi, J.; Cossi, M.; Rega, N.; Millam, J. M.; Klene, M.; Knox, J. E.; Cross, J. B.; Bakken, V.; Adamo, C.; Jaramillo, J.; Gomperts, R.; Stratmann, R. E.; Yazyev, O.; Austin, A. J.; Cammi, R.; Pomelli, C.; Ochterski, J. W.; Martin, R. L.; Morokuma, K.; Zakrzewski, V. G.; Voth, G. A.; Salvador, P.; Dannenberg, J. J.; Dapprich, S.; Daniels, A. D.; Farkas, Ö.; Foresman, J. B.; Ortiz, J. V.; Cioslowski, J.; Fox, D. J. *Gaussian 09 Revision E.01*; Gaussian, Inc.: Wallingford, 2009.
- (S8) Becke, A. D. Density-Functional Thermochemistry. III. The Role of Exact Exchange. *Journal of Chemical Physics* **1993**, *98*, 5648–5652. <https://doi.org/10.1063/1.464913>.
- (S9) Lee, C.; Yang, W.; Parr, R. G. Development of the Colle-Salvetti Correlation-Energy Formula into a Functional of the Electron Density. *Phys. Rev. B* **1988**, *37* (2), 785–789. <https://doi.org/10.1103/PhysRevB.37.785>.
- (S10) Sun, L.; Wang, Y.; Yang, F.; Zhang, X.; Hu, W. Cocrystal Engineering: A Collaborative Strategy toward Functional Materials. *Advanced Materials* **2019**, *31* (39), 1902328. <https://doi.org/10.1002/adma.201902328>.
- (S11) Nanova, D.; Beck, S.; Fuchs, A.; Glaser, T.; Lennartz, C.; Kowalsky, W.; Pucci, A.; Kroeger, M. Charge Transfer in Thin Films of Donor–Acceptor Complexes Studied by Infrared Spectroscopy. *Organic Electronics* **2012**, *13* (7), 1237–1244. <https://doi.org/10.1016/j.orgel.2012.02.021>.
- (S12) Ferrari, E.; Mezzadri, F.; Masino, M. Temperature-Induced Neutral-to-Ionic Phase Transition of the Charge-Transfer Crystal Tetrathiafulvalene-Fluoranyl. *Phys. Rev. B* **2022**, *105* (5), 054106. <https://doi.org/10.1103/PhysRevB.105.054106>.
- (S13) Navarro-Huerta, A.; Hall, D. A.; Blahut, J.; Gómez-Vidales, V.; Teat, S. J.; Marmolejo-Tejada, J. M.; Dračinský, M.; Mosquera, M. A.; Rodríguez-Molina, B. Influence of Internal Molecular Motions in the Photothermal Conversion Effect of Charge-Transfer Cocrystals. *Chem. Mater.* **2023**, *35* (23), 10009–10017. <https://doi.org/10.1021/acs.chemmater.3c01944>.
